# Supplementary material for: Cadmium and Zinc Concentration in Grain of Durum Wheat in Relation to Phosphorus Fertilization, Crop Sequence and Tillage Management
Source: Hindawi journal article supplement (doi:10.1155/2012/817107), 2012-01-01
Supplement: f1 [file 817107.f1.xls]

## Sheet: Sheet1
Cadmium and zinc concentration in grain of durum wheat in relation to phosphorus fertilization, crop sequence and tillage management
X. Gao, C. A. Grant
Supplementary Table 1. Grain yield, grain concentrations of protein, Cd, Zn, Fe, P, Mn, Cu, Ca, K, Mg, and soil parameters including pH, EC, Olsen-P, DTPA-Cd and DTPA-Zn
									Grain										Soil
Test	Site	year	treat	rep	Croprotation	P-fertilization	tillage	Grain yield	protein	Cd	Zn	Fe	P	Mn	Cu	Ca	K	Mg	pH	EC	Soil Olsen-P	Soil DTPA-Cd	Soil DTPA-Zn
								(kg/ha)	(g/100g)	(µg/kg)	(mg/kg)	(mg/kg)	(mg/kg)	(mg/kg)	(mg/kg)	(mg/kg)	(mg/kg)	(mg/kg)			(mg/kg)	(µg/kg)	(mg/kg)
2001_P_Till_3	BRC-North	2001	5	1	Wheat-Flax-Dur	50-0-25	CT	1989.4	15.9	88.34	39.15	51.35	4890.44	42.69	5.41	245.38	5536.55	1825.47	.	.	18	145.89	1.93
2001_P_Till_3	BRC-North	2001	7	1	Canolat-Flax-Dur	0-0-25	CT	1932	16.4	89.28	43.38	53.44	5033	41.91	5.35	283.63	5693.03	1854.67	.	.	23.25	144.82	1.28
2001_P_Till_3	BRC-North	2001	6	1	Wheat-Flax-Dur	50-25-0	CT	1820.4	16.4	98.9	40.11	48.77	4949.14	39.66	5.23	251.64	5380.69	1828.01	.	.	29.25	160.43	1.46
2001_P_Till_3	BRC-North	2001	3	1	Wheat-Flax-Dur	25-0-25	CT	1959.2	16.4	88.74	39.78	46.93	4869.05	36.8	5.06	249.28	5450.49	1828.02	.	.	25.75	152.31	1.4
2001_P_Till_3	BRC-North	2001	10	1	Canolat-Flax-Dur	25-25-0	CT	2087.6	17	102.41	42.36	48.76	4949.86	36.93	4.85	265.54	5458.51	1881.75	.	.	23	143.82	1.23
2001_P_Till_3	BRC-North	2001	9	1	Canolat-Flax-Dur	25-0-25	CT	1828	16.8	106.38	42.84	51.18	5058.41	39.91	5.16	289.35	5651.07	1863.96	.	.	25	136.42	1.25
2001_P_Till_3	BRC-North	2001	12	1	Canolat-Flax-Dur	50-25-0	CT	1920.6	16.5	127.73	40.46	50.01	5007.57	39.44	4.54	238.48	5483.32	1878.87	.	.	21.5	115.03	1.36
2001_P_Till_3	BRC-North	2001	1	1	Wheat-Flax-Dur	0-0-25	CT	1978.6	16.7	134.41	40.47	48.98	4958.46	36.28	4.78	249.38	5503.42	1840.4	.	.	23.75	137.7	1.25
2001_P_Till_3	BRC-North	2001	2	1	Wheat-Flax-Dur	0-25-0	CT	1854.2	16.5	108.94	40.73	49.71	4935.33	36.88	4.92	249.62	5576.83	1836.64	.	.	17	133.51	1.4
2001_P_Till_3	BRC-North	2001	4	1	Wheat-Flax-Dur	25-25-0	CT	2114	16.6	129.42	41.18	52.69	4988.23	38.19	5.07	269.04	5627.11	1842.03	.	.	21	121.52	1.26
2001_P_Till_3	BRC-North	2001	11	1	Canolat-Flax-Dur	50-0-25	CT	1694.2	16.6	119.15	40.59	51.75	5112.94	39.95	5.02	268.35	5631.12	1881.56	.	.	25.25	137.88	1.33
2001_P_Till_3	BRC-North	2001	8	1	Canolat-Flax-Dur	0-25-0	CT	1571.4	16.4	80.51	45.95	51.85	4997	39.93	5.3	249.97	5478.72	1812.32	.	.	16	134.31	1.26
2001_P_Till_3	BRC-North	2001	2	1	Wheat-Flax-Dur	0-25-0	ZT	1067	16.8	108.73	48.6	57.76	5121.71	45.54	5.73	263.18	5240.47	1869.27	.	.	22.5	118.28	1.51
2001_P_Till_3	BRC-North	2001	10	1	Canolat-Flax-Dur	25-25-0	ZT	1351	16.8	96.29	45.36	53.26	5070.58	44.77	5.3	250.76	5290.75	1816.17	.	.	17.5	144.93	1.08
2001_P_Till_3	BRC-North	2001	3	1	Wheat-Flax-Dur	25-0-25	ZT	1467.2	16.4	91.8	45.81	52.15	5032.29	46.35	5.75	250.31	5345.5	1853.53	.	.	23.75	130.62	1.21
2001_P_Till_3	BRC-North	2001	11	1	Canolat-Flax-Dur	50-0-25	ZT	1885.6	16.1	108.16	38.69	51.4	5042.31	42.79	4.92	264.01	5487.19	1803.75	.	.	21.5	133.4	2.2
2001_P_Till_3	BRC-North	2001	4	1	Wheat-Flax-Dur	25-25-0	ZT	2079.2	16	113.73	36.97	49.02	4922.59	39.97	4.9	253.12	5234.24	1713.07	.	.	20.5	156.68	1
2001_P_Till_3	BRC-North	2001	12	1	Canolat-Flax-Dur	50-25-0	ZT	1723.4	16.2	126.09	36.07	50.94	5042.84	42.95	5.25	278.9	5460.61	1835.25	.	.	33.5	157.3	1.31
2001_P_Till_3	BRC-North	2001	8	1	Canolat-Flax-Dur	0-25-0	ZT	2071.4	16.2	98.11	37.77	50.93	4934.43	40.09	5.39	275.99	5367.06	1778.24	.	.	28.75	124.77	1.08
2001_P_Till_3	BRC-North	2001	7	1	Canolat-Flax-Dur	0-0-25	ZT	2164.8	16.4	109.71	37.14	53.36	5032.82	40.71	5.69	311.03	5651.97	1861.63	.	.	22.5	128.66	0.97
2001_P_Till_3	BRC-North	2001	1	1	Wheat-Flax-Dur	0-0-25	ZT	1845.2	16.2	93.35	36.16	51.39	4898.52	40.84	7.55	265.05	5336.6	1784.44	.	.	32	134.84	0.94
2001_P_Till_3	BRC-North	2001	5	1	Wheat-Flax-Dur	50-0-25	ZT	1743	16	140.79	28.97	46.67	4759.48	37.94	4.85	248.93	5134.05	1707.9	.	.	34.75	124.68	1.73
2001_P_Till_3	BRC-North	2001	6	1	Wheat-Flax-Dur	50-25-0	ZT	2000	16.4	122.32	35.31	52.69	5304.78	45.53	5.21	289.35	5775.25	1901.58	.	.	38.5	137.8	1.08
2001_P_Till_3	BRC-North	2001	9	1	Canolat-Flax-Dur	25-0-25	ZT	1893.4	16.3	146.8	35.9	52.96	5064.85	42.17	5.075	289.665	5391.3	1827.89	.	.	32.25	115.57	1.41
2001_P_Till_3	BRC-North	2001	7	2	Canolat-Flax-Dur	0-0-25	ZT	2055	16.2	113.36	42.18	48.17	4578.57	39.22	5.32	275.26	5461.07	1687.42	.	.	16	147.87	0.96
2001_P_Till_3	BRC-North	2001	9	2	Canolat-Flax-Dur	25-0-25	ZT	2137.4	16.4	92.31	43.22	47.9	4744.17	39.81	5.26	265.23	5691.36	1771.39	.	.	24	146.01	1.01
2001_P_Till_3	BRC-North	2001	5	2	Wheat-Flax-Dur	50-0-25	ZT	2101	16.1	93.13	40	45.53	4495.36	36.97	5.09	247.55	5295.32	1609.17	.	.	15	122.82	0.99
2001_P_Till_3	BRC-North	2001	6	2	Wheat-Flax-Dur	50-25-0	ZT	1939	16.5	116.2	40.56	50.16	4732.17	36.13	5.12	293.86	5483.49	1681.5	.	.	21.5	144.35	1.27
2001_P_Till_3	BRC-North	2001	3	2	Wheat-Flax-Dur	25-0-25	ZT	1938.2	15.7	87.9	41.29	47.63	4574.47	37.03	5.35	254.8	5382.23	1648.52	.	.	14	157.15	1.02
2001_P_Till_3	BRC-North	2001	12	2	Canolat-Flax-Dur	50-25-0	ZT	1898.6	16.1	119.51	38.65	47.99	4705.14	38.43	5.32	244.06	5432.85	1723.7	.	.	18.25	129.63	0.96
2001_P_Till_3	BRC-North	2001	11	2	Canolat-Flax-Dur	50-0-25	ZT	2153.4	15.6	123.05	41.3	49.96	5170.32	44	5.87	252.07	6032.09	1870.25	.	.	19.75	140.22	0.87
2001_P_Till_3	BRC-North	2001	1	2	Wheat-Flax-Dur	0-0-25	ZT	2007.8	16	94.52	42.47	48.93	4762.38	38.9	5.57	245.37	5554.1	1782.2	.	.	15.25	143.41	0.88
2001_P_Till_3	BRC-North	2001	2	2	Wheat-Flax-Dur	0-25-0	ZT	1889.6	16.6	97.81	44.01	52.14	4778.32	38.14	5.92	255	5303.6	1735.43	.	.	14.75	136.08	0.96
2001_P_Till_3	BRC-North	2001	4	2	Wheat-Flax-Dur	25-25-0	ZT	1963.2	16.4	104.79	42.77	52.83	4949.05	41.19	5.69	250.28	5682.87	1811.02	.	.	18.75	129.62	0.96
2001_P_Till_3	BRC-North	2001	8	2	Canolat-Flax-Dur	0-25-0	ZT	1920.6	16	109.93	42.53	48.63	4725.03	41.9	5.64	237.24	5448.5	1752.14	.	.	16	128.77	0.82
2001_P_Till_3	BRC-North	2001	10	2	Canolat-Flax-Dur	25-25-0	ZT	1896	16.1	111.43	42.63	48.48	4957.07	43.03	5.48	241.2	5645.36	1803.55	.	.	19.5	130.18	1.31
2001_P_Till_3	BRC-North	2001	9	2	Canolat-Flax-Dur	25-0-25	CT	2031.2	15.9	144.67	36.58	51.11	4654.67	38.94	5.86	269.91	5422.87	1726.45	.	.	14.75	124.66	0.97
2001_P_Till_3	BRC-North	2001	3	2	Wheat-Flax-Dur	25-0-25	CT	1610.8	16.2	112.76	38.85	49.57	4769.51	39.59	5.9	255.04	5604.02	1799.75	.	.	15.5	174.41	1.23
2001_P_Till_3	BRC-North	2001	7	2	Canolat-Flax-Dur	0-0-25	CT	1887.4	16	122.39	35.8	46.23	4558.62	38.34	5.46	248.1	5343.3	1682.27	.	.	13.25	101.44	0.59
2001_P_Till_3	BRC-North	2001	5	2	Wheat-Flax-Dur	50-0-25	CT	1835	16.2	121.04	37.56	51.02	4859.43	41.82	6.19	248.46	5756.07	1839.33	.	.	17	109.16	0.58
2001_P_Till_3	BRC-North	2001	8	2	Canolat-Flax-Dur	0-25-0	CT	1914.6	16.3	124.8	35.47	46.06	4742.95	36.9	5.69	236.29	5501.74	1797.75	.	.	14.25	113.32	0.76
2001_P_Till_3	BRC-North	2001	11	2	Canolat-Flax-Dur	50-0-25	CT	1691.6	16.1	145.21	29.35	42.59	4556.48	35.73	5.4	237.44	5204.81	1709.37	.	.	20.5	115.24	0.91
2001_P_Till_3	BRC-North	2001	6	2	Wheat-Flax-Dur	50-25-0	CT	1889.2	16	111.32	34.63	46.32	4686.14	38.72	5.62	239.3	5265.14	1714.16	.	.	19.5	100.75	0.6
2001_P_Till_3	BRC-North	2001	4	2	Wheat-Flax-Dur	25-25-0	CT	1909.8	16.2	137.54	33.88	48.85	4957.82	40.88	6.04	278.67	5575.31	1804.14	.	.	19.5	120.51	0.68
2001_P_Till_3	BRC-North	2001	2	2	Wheat-Flax-Dur	0-25-0	CT	1932.2	16.3	113.08	36	51.72	5094.36	45	6.51	284.38	5690.25	1834.44	.	.	26.25	104.82	0.78
2001_P_Till_3	BRC-North	2001	12	2	Canolat-Flax-Dur	50-25-0	CT	1947.4	16.4	147.16	32.48	48.16	4801.98	38.05	5.74	285.29	5426.12	1735.12	.	.	24.25	114.87	0.8
2001_P_Till_3	BRC-North	2001	10	2	Canolat-Flax-Dur	25-25-0	CT	1877	16.1	177.69	29.3	46.65	4775.28	38.05	5.41	269.75	5270.96	1704.37	.	.	21.5	141.46	0.78
2001_P_Till_3	BRC-North	2001	1	2	Wheat-Flax-Dur	0-0-25	CT	1863.8	16.7	181.14	30.51	49.88	4865.19	38.68	5.84	272.84	5373.8	1763.94	.	.	29.75	129.19	0.79
2001_P_Till_3	BRC-North	2001	6	3	Wheat-Flax-Dur	50-25-0	ZT	1938.6	15.6	95.59	37.91	50.31	4831.09	38.51	6.07	258.77	5179.25	1716.04	.	.	20.25	161.36	0.93
2001_P_Till_3	BRC-North	2001	9	3	Canolat-Flax-Dur	25-0-25	ZT	2034.8	15.8	114.16	40.55	48.75	4771.94	37.98	6.24	254.69	5311.57	1709.2	.	.	14.75	128.76	1.05
2001_P_Till_3	BRC-North	2001	8	3	Canolat-Flax-Dur	0-25-0	ZT	1848	16	115.23	44.47	49.87	4841.99	40.52	5.95	242.71	5330.88	1709.76	.	.	15.75	125.94	0.81
2001_P_Till_3	BRC-North	2001	11	3	Canolat-Flax-Dur	50-0-25	ZT	1938.4	15.8	172.78	45.81	48.28	4750.84	38.1	5.75	241.88	5313.26	1655.24	.	.	18	125.09	1.2
2001_P_Till_3	BRC-North	2001	2	3	Wheat-Flax-Dur	0-25-0	ZT	1844.4	15.9	127.9	58.45	61.72	5967.49	51.33	7.4	330.76	6700.39	2146.53	.	.	21	149.59	1.01
2001_P_Till_3	BRC-North	2001	5	3	Wheat-Flax-Dur	50-0-25	ZT	1943.6	15.6	129.3	39.35	49.02	4894.42	39.65	5.66	247.59	5438.98	1714.8	.	.	16.5	133.05	1.18
2001_P_Till_3	BRC-North	2001	7	3	Canolat-Flax-Dur	0-0-25	ZT	2021.6	15.5	117.59	42.3	52.51	4922.27	44.07	6.19	256.43	5561.78	1804.17	.	.	13.75	135.46	0.89
2001_P_Till_3	BRC-North	2001	3	3	Wheat-Flax-Dur	25-0-25	ZT	1711.8	15.8	108.42	40.56	49.98	4841.1	41.68	6.08	255.2	5489.62	1748.73	.	.	19.25	134.44	0.96
2001_P_Till_3	BRC-North	2001	1	3	Wheat-Flax-Dur	0-0-25	ZT	1891.2	15.4	97.67	41.13	48.27	4701.33	41.36	6.13	256.39	5294.56	1673.11	.	.	14.75	128.39	0.73
2001_P_Till_3	BRC-North	2001	10	3	Canolat-Flax-Dur	25-25-0	ZT	1920	15.8	149.59	36.93	48.37	4912.73	42.27	5.89	241.84	5453.4	1732.09	.	.	20.25	146.63	0.77
2001_P_Till_3	BRC-North	2001	12	3	Canolat-Flax-Dur	50-25-0	ZT	2003	15.8	148.9	37.78	48.47	4835.49	41.36	5.86	251.51	5217.51	1697.25	.	.	19.25	130.26	0.7
2001_P_Till_3	BRC-North	2001	4	3	Wheat-Flax-Dur	25-25-0	ZT	1914.2	15.6	136.32	45.72	54.27	4984.89	44.51	6.23	260.08	5359.09	1729.09	.	.	15.75	135.1	0.72
2001_P_Till_3	BRC-North	2001	12	3	Canolat-Flax-Dur	50-25-0	CT	1809	16	121.18	37.71	52.88	4932.47	42.065	6.345	249.885	5419.12	1799.67	.	.	17.25	132.49	0.72
2001_P_Till_3	BRC-North	2001	10	3	Canolat-Flax-Dur	25-25-0	CT	1712.6	15.8	104	36.2	43.68	4547.01	33.37	6.08	254.64	5347.84	1729.3	.	.	16.25	117.69	0.71
2001_P_Till_3	BRC-North	2001	7	3	Canolat-Flax-Dur	0-0-25	CT	1819.4	16	136.2	36.07	48.02	4511.68	37.63	5.89	258.85	5499.68	1751.82	.	.	16	117.28	0.78
2001_P_Till_3	BRC-North	2001	11	3	Canolat-Flax-Dur	50-0-25	CT	1705	16.2	156.51	32.48	46.34	4863.92	37.46	5.53	225.15	5469.19	1889.86	.	.	17.5	111.9	0.84
2001_P_Till_3	BRC-North	2001	6	3	Wheat-Flax-Dur	50-25-0	CT	1812.2	16.5	124.21	36.92	43.71	4925.43	40.55	5.44	215.75	5720.31	1913.84	.	.	14	106.58	0.63
2001_P_Till_3	BRC-North	2001	1	3	Wheat-Flax-Dur	0-0-25	CT	1625	16.1	110.91	34.4	42.94	4683.32	36.37	5.37	218.85	5544.58	1814.61	.	.	18.25	98.69	0.75
2001_P_Till_3	BRC-North	2001	3	3	Wheat-Flax-Dur	25-0-25	CT	1544.6	15.7	114.9	43.36	50.62	5035.74	41.9	6.42	243.78	5531.97	1860.08	.	.	16.25	114.64	0.65
2001_P_Till_3	BRC-North	2001	8	3	Canolat-Flax-Dur	0-25-0	CT	1509	16.2	122.25	37.54	48.83	4773.18	40.2	6.06	232.17	5539.9	1786.61	.	.	22	94.04	0.69
2001_P_Till_3	BRC-North	2001	4	3	Wheat-Flax-Dur	25-25-0	CT	1355.6	15.9	103.93	33.74	42.72	4506.39	36.05	5.81	208.05	5278.56	1664.86	.	.	21.25	111.43	0.74
2001_P_Till_3	BRC-North	2001	2	3	Wheat-Flax-Dur	0-25-0	CT	1543.4	16.2	126.54	37.52	52.23	5411.06	40.56	6.95	272.24	6346.37	2041.38	.	.	31.25	133.5	0.7
2001_P_Till_3	BRC-North	2001	5	3	Wheat-Flax-Dur	50-0-25	CT	1647.4	16	136.11	33.56	50.32	4991.17	40.95	6.49	264.44	5907.19	1856.54	.	.	21.75	114.4	0.68
2001_P_Till_3	BRC-North	2001	9	3	Canolat-Flax-Dur	25-0-25	CT	1882	16.3	123.16	35.8	48.73	4802.41	37.8	6.28	262.55	5503.78	1758.5	.	.	26.75	118.31	0.92
2001_P_Till_3	BRC-North	2001	5	4	Wheat-Flax-Dur	50-0-25	CT	2011.4	16.3	152.5	48.18	56.35	4914.38	40.35	6.79	266.56	5643.43	1790.78	.	.	16.25	121.44	0.73
2001_P_Till_3	BRC-North	2001	2	4	Wheat-Flax-Dur	0-25-0	CT	1834.8	16.3	118.07	48.65	52.75	4814.28	37.88	6.72	261.78	5547.01	1822.77	.	.	14.75	139.15	0.69
2001_P_Till_3	BRC-North	2001	12	4	Canolat-Flax-Dur	50-25-0	CT	1598	14.9	155.18	36.29	49.36	4771.47	37.6	6.13	256.66	5284.62	1626.44	.	.	16.25	122.97	0.85
2001_P_Till_3	BRC-North	2001	8	4	Canolat-Flax-Dur	0-25-0	CT	1550	16.5	101.91	42.36	49.23	4538.27	35.79	6.34	239.87	5328.23	1712.21	.	.	17.75	118.8	0.69
2001_P_Till_3	BRC-North	2001	11	4	Canolat-Flax-Dur	50-0-25	CT	1789.6	16.3	103.29	36.83	45.88	4762.82	35.64	6.06	234.55	5487.99	1807.88	.	.	18.75	129.7	0.79
2001_P_Till_3	BRC-North	2001	10	4	Canolat-Flax-Dur	25-25-0	CT	1738.4	16.5	90.79	34.87	43.01	4453.11	33.64	5.42	223.13	5643.96	1825.46	.	.	17	119.28	0.74
2001_P_Till_3	BRC-North	2001	7	4	Canolat-Flax-Dur	0-0-25	CT	1820	16.2	105.09	34.02	40.19	4168.51	31.3	5.21	211.35	5337.38	1682.76	.	.	14	97.83	0.6
2001_P_Till_3	BRC-North	2001	1	4	Wheat-Flax-Dur	0-0-25	CT	1462	16.7	88.96	40.7	48.39	4308.83	36.22	5.7	253.14	5658.76	1781.76	.	.	14.75	98.99	0.69
2001_P_Till_3	BRC-North	2001	3	4	Wheat-Flax-Dur	25-0-25	CT	1737.8	16.6	118.33	36.2	43.34	4396.36	35.13	5.52	229.28	5483.01	1735.74	.	.	20.75	122.58	0.71
2001_P_Till_3	BRC-North	2001	4	4	Wheat-Flax-Dur	25-25-0	CT	1799.4	16.3	106.86	41.71	47.64	4734.37	37.47	6.27	276.21	5581.67	1751.29	.	.	16.5	133.42	0.71
2001_P_Till_3	BRC-North	2001	9	4	Canolat-Flax-Dur	25-0-25	CT	1718.2	16.2	113.93	45.57	47.67	4572.42	35.07	5.16	251.48	5653.3	1730.25	.	.	16.75	120.76	0.84
2001_P_Till_3	BRC-North	2001	6	4	Wheat-Flax-Dur	50-25-0	CT	1764.8	16.2	120.14	39.91	46.51	4700.33	34.79	5.3	260.63	5770.87	1733.85	.	.	15.25	131.55	0.82
2001_P_Till_3	BRC-North	2001	12	4	Canolat-Flax-Dur	50-25-0	ZT	1753.6	15.2	106.99	34.73	41.03	4609.8	33.78	5.57	229.84	5594.81	1681.45	.	.	17	128.58	0.67
2001_P_Till_3	BRC-North	2001	7	4	Canolat-Flax-Dur	0-0-25	ZT	1840.4	15.8	137.54	35.84	45	4591.51	36.52	5.78	237.68	5668.63	1716.69	.	.	17	110.98	0.7
2001_P_Till_3	BRC-North	2001	8	4	Canolat-Flax-Dur	0-25-0	ZT	1738	15.5	107.51	41.82	45.25	4854.06	39.22	6.31	238.02	5395.64	1723.93	.	.	16.25	102.11	0.64
2001_P_Till_3	BRC-North	2001	4	4	Wheat-Flax-Dur	25-25-0	ZT	1657.4	15.8	115.7	41.79	46.33	4621.06	35.62	5.32	244.12	5629.69	1712.03	.	.	16	111.63	0.63
2001_P_Till_3	BRC-North	2001	10	4	Canolat-Flax-Dur	25-25-0	ZT	1931	15.8	150.69	44.66	50.51	4675.53	35.18	5.78	249.17	5556.77	1696.01	.	.	17.25	113.14	0.72
2001_P_Till_3	BRC-North	2001	6	4	Wheat-Flax-Dur	50-25-0	ZT	2015.6	15.1	165.88	36.73	47.32	5310.32	38.76	6.09	293.03	6499.63	1950.99	.	.	11.25	93.31	0.6
2001_P_Till_3	BRC-North	2001	2	4	Wheat-Flax-Dur	0-25-0	ZT	1638.2	15.4	103.5	35.57	43.67	4528.11	34.35	5.84	225.76	5474.56	1740.55	.	.	20	108.62	0.63
2001_P_Till_3	BRC-North	2001	1	4	Wheat-Flax-Dur	0-0-25	ZT	2088.8	16	142.03	33.98	45.55	4888.84	34.7	6.1	293.25	5411.26	1708.46	.	.	14.5	119.84	0.66
2001_P_Till_3	BRC-North	2001	3	4	Wheat-Flax-Dur	25-0-25	ZT	1972.6	15.1	150.84	34.03	43.74	4872.22	34.88	6.11	247.09	5259.21	1637.55	.	.	17.25	108.55	0.62
2001_P_Till_3	BRC-North	2001	11	4	Canolat-Flax-Dur	50-0-25	ZT	1837	15.7	164.4	33.76	49.5	5062.03	35.73	6.38	294.74	5896.54	1741.15	.	.	23	118.73	0.75
2001_P_Till_3	BRC-North	2001	5	4	Wheat-Flax-Dur	50-0-25	ZT	1971.2	15.3	143.16	40.77	48.5	5021.19	34.95	6.25	274.39	5489.63	1662.24	.	.	21.5	110.92	0.72
2001_P_Till_3	BRC-North	2001	9	4	Canolat-Flax-Dur	25-0-25	ZT	1955.4	15.7	155.61	36.215	48.29	5028.85	35.845	6.255	284.57	5556.07	1725.38	.	.	25.5	106.41	1.35
2001_P_Till_3	MZTRF	2001	5	1	Wheat-Flax-Dur	50-0-25	CT	3137.2	16.6	54	49.29	54.3	4826.87	37.14	5.52	415.5	4984.66	1773.72	.	.	18.25	142.9	1.96
2001_P_Till_3	MZTRF	2001	7	1	Canolat-Flax-Dur	0-0-25	CT	3191.6	16.8	57.58	49.55	50.52	4494.38	33.79	5.15	409.98	4703.11	1647.94	.	.	16.5	115.62	2.7
2001_P_Till_3	MZTRF	2001	6	1	Wheat-Flax-Dur	50-25-0	CT	3503.8	16.7	51.59	46.38	47.57	4311.84	34.67	5	405.46	4566.6	1531.45	.	.	19.75	124.44	1.68
2001_P_Till_3	MZTRF	2001	3	1	Wheat-Flax-Dur	25-0-25	CT	3210.2	16.5	64.66	42.89	48.71	4180.23	36.65	5.02	418.45	4678.23	1498.85	.	.	14.75	127.74	1.46
2001_P_Till_3	MZTRF	2001	10	1	Canolat-Flax-Dur	25-25-0	CT	2954.8	16.7	62.32	43.01	47.57	4081.85	36.88	4.87	468.86	4801.05	1485.36	.	.	14.5	119.54	1.38
2001_P_Till_3	MZTRF	2001	9	1	Canolat-Flax-Dur	25-0-25	CT	3316	16.6	84.78	42.17	47.97	4431.4	38.65	4.83	466.23	5040.03	1546.1	.	.	19.75	104.69	1.83
2001_P_Till_3	MZTRF	2001	12	1	Canolat-Flax-Dur	50-25-0	CT	3193.2	16.7	72.14	41.39	46.63	4134.78	39.04	5.44	445.33	4827.33	1487.86	.	.	18	127.4	1.2
2001_P_Till_3	MZTRF	2001	1	1	Wheat-Flax-Dur	0-0-25	CT	3386.8	16.6	70.06	47.44	51.26	4258.02	40.3	5.51	410.31	4577.52	1529.46	.	.	16	111.36	0.9
2001_P_Till_3	MZTRF	2001	2	1	Wheat-Flax-Dur	0-25-0	CT	3093.6	16.8	54.72	45.73	50.1	4054.39	39.87	5.595	404.76	4456.62	1536.89	.	.	13.5	113.13	0.92
2001_P_Till_3	MZTRF	2001	4	1	Wheat-Flax-Dur	25-25-0	CT	3401.8	16.4	57.86	36.96	41.99	4058.96	36.35	5.07	386.1	4968.94	1580.76	.	.	13	93.99	0.68
2001_P_Till_3	MZTRF	2001	11	1	Canolat-Flax-Dur	50-0-25	CT	3372.4	16.7	88.75	34.27	40.55	4107.44	38.41	4.49	371.15	4898.8	1565.62	.	.	11.5	103.09	0.68
2001_P_Till_3	MZTRF	2001	8	1	Canolat-Flax-Dur	0-25-0	CT	3550.8	16.6	84.37	38.43	42.93	4097.63	36.06	4.52	392.94	4895.39	1555.75	.	.	14.25	124.48	0.93
2001_P_Till_3	MZTRF	2001	2	1	Wheat-Flax-Dur	0-25-0	ZT	3214.4	16.5	55.67	41.97	50.25	3863.95	36.77	5.15	400.44	4823.44	1527.88	.	.	13.5	141.68	1.29
2001_P_Till_3	MZTRF	2001	10	1	Canolat-Flax-Dur	25-25-0	ZT	3567.8	16.2	75.45	35.44	41.84	3999.82	38.35	4.82	383.85	4789.9	1483.2	.	.	13.5	123.14	0.75
2001_P_Till_3	MZTRF	2001	3	1	Wheat-Flax-Dur	25-0-25	ZT	3321.2	16.5	76.97	34.99	41.1	4076.83	38.22	5.03	370.55	4719.42	1528.1	.	.	15	132.11	0.88
2001_P_Till_3	MZTRF	2001	11	1	Canolat-Flax-Dur	50-0-25	ZT	3203.4	16.2	75.05	34.67	40.25	4037.16	37.8	5.38	346.63	4533.59	1552.58	.	.	16	121.8	0.75
2001_P_Till_3	MZTRF	2001	4	1	Wheat-Flax-Dur	25-25-0	ZT	3059.4	16.4	91.05	38.26	42.76	3999.82	33.93	5.46	372.91	4515.15	1548.44	.	.	15.25	114.52	0.77
2001_P_Till_3	MZTRF	2001	12	1	Canolat-Flax-Dur	50-25-0	ZT	3037.4	16.1	79.77	35.17	43.12	4237.89	37.52	5.02	351.28	4674.54	1592.25	.	.	16.75	119.63	0.9
2001_P_Till_3	MZTRF	2001	8	1	Canolat-Flax-Dur	0-25-0	ZT	3485.4	16.6	86.3	38.75	48.98	4188.96	38.19	5.46	408.37	4750.11	1633.87	.	.	14	112.45	0.8
2001_P_Till_3	MZTRF	2001	7	1	Canolat-Flax-Dur	0-0-25	ZT	3376.6	16.5	71.15	37.18	43.48	4059.55	34.46	5	378.22	4658.77	1536.34	.	.	12	109.99	0.84
2001_P_Till_3	MZTRF	2001	1	1	Wheat-Flax-Dur	0-0-25	ZT	3304.6	16.6	97.86	37.44	43.49	4082.32	35.67	5.14	401.53	4643.29	1584.97	.	.	11.75	119.82	0.85
2001_P_Till_3	MZTRF	2001	5	1	Wheat-Flax-Dur	50-0-25	ZT	3487.4	16.4	106.1	36.49	44.04	4366	38.91	4.85	402.68	4841.78	1622.05	.	.	15	116.04	0.86
2001_P_Till_3	MZTRF	2001	6	1	Wheat-Flax-Dur	50-25-0	ZT	3122.4	16.8	75.78	40.23	42.92	4482.28	38.6	5.2	384.02	4878.75	1638.37	.	.	15	120.27	0.86
2001_P_Till_3	MZTRF	2001	9	1	Canolat-Flax-Dur	25-0-25	ZT	3030.4	16.7	76.99	41.63	46.79	4609.3	38.51	5.24	358.02	4780.94	1698.31	.	.	21.75	118.57	1.04
2001_P_Till_3	MZTRF	2001	7	2	Canolat-Flax-Dur	0-0-25	ZT	3339.4	16.5	69.73	59.27	53.31	4393.1	32.33	4.99	386.86	4841.51	1570.85	.	.	15.5	124.15	1.32
2001_P_Till_3	MZTRF	2001	9	2	Canolat-Flax-Dur	25-0-25	ZT	3068.4	16.7	63.26	42.68	48.66	4315.46	32.65	5.04	380.57	4662.32	1577.16	.	.	14.75	123.18	1.48
2001_P_Till_3	MZTRF	2001	5	2	Wheat-Flax-Dur	50-0-25	ZT	3256	16.2	72.07	43.35	44.87	4369.32	28.62	4.95	375.04	4670.84	1566.47	.	.	13.25	122.72	1.37
2001_P_Till_3	MZTRF	2001	6	2	Wheat-Flax-Dur	50-25-0	ZT	3501.8	16.1	69.2	41.93	43.83	4226.34	27.14	4.89	384.67	4637.61	1507.19	.	.	15.5	129.91	1.34
2001_P_Till_3	MZTRF	2001	3	2	Wheat-Flax-Dur	25-0-25	ZT	3435	16.5	79.62	46.37	48.65	4518.25	32.31	5.28	426.05	4940.05	1647.14	.	.	14.5	132.01	1.25
2001_P_Till_3	MZTRF	2001	12	2	Canolat-Flax-Dur	50-25-0	ZT	3413	16.3	80.32	41.47	45.52	4461.64	34.05	5.07	402.74	4847.89	1543.19	.	.	17.5	130.06	1.24
2001_P_Till_3	MZTRF	2001	11	2	Canolat-Flax-Dur	50-0-25	ZT	3537	16.4	81.9	40.08	44.31	4534.18	36.27	4.84	433.33	5082.25	1524.98	.	.	13.25	113.35	1.01
2001_P_Till_3	MZTRF	2001	1	2	Wheat-Flax-Dur	0-0-25	ZT	3285	16.5	83.67	41.91	46.65	4279.5	37.87	5.17	426.16	4829.28	1491.55	.	.	13.25	136.64	1.04
2001_P_Till_3	MZTRF	2001	2	2	Wheat-Flax-Dur	0-25-0	ZT	3205.2	16.5	69.77	43.27	46.08	4064.85	34.34	5.69	376.19	4423.23	1521.8	.	.	12.5	113.13	0.81
2001_P_Till_3	MZTRF	2001	4	2	Wheat-Flax-Dur	25-25-0	ZT	2519	16	64.13	42.98	45.62	4228.1	36.41	5.8	346.47	4530.03	1540.8	.	.	15.25	117.67	0.92
2001_P_Till_3	MZTRF	2001	8	2	Canolat-Flax-Dur	0-25-0	ZT	2947.6	16.6	95.01	41.61	49.53	4178	37.26	5.78	362.4	4463.78	1602.77	.	.	13.75	120.27	0.84
2001_P_Till_3	MZTRF	2001	10	2	Canolat-Flax-Dur	25-25-0	ZT	2886.8	16.2	88.59	41.68	47.82	4404.01	37.42	5.96	356.32	4617.45	1665.16	.	.	14.5	105.26	0.95
2001_P_Till_3	MZTRF	2001	9	2	Canolat-Flax-Dur	25-0-25	CT	3535.8	16.8	100.32	39.83	45.32	4484.22	37.74	5.13	424.9	4842.92	1617.06	.	.	13.75	119.36	0.88
2001_P_Till_3	MZTRF	2001	3	2	Wheat-Flax-Dur	25-0-25	CT	3339.8	16.7	84.04	37.06	45.07	4405.57	41.17	5.26	410.84	4894.96	1631.09	.	.	16.75	127.12	0.8
2001_P_Till_3	MZTRF	2001	7	2	Canolat-Flax-Dur	0-0-25	CT	3570.6	16.7	93.49	36.07	45.92	4111.75	39.23	5.08	421.01	4599	1499.87	.	.	14.25	127.1	0.75
2001_P_Till_3	MZTRF	2001	5	2	Wheat-Flax-Dur	50-0-25	CT	3447.2	16.7	91.19	38.02	49.16	4690.69	44.32	5.19	469.5	5076.57	1635.39	.	.	18.25	142.59	0.93
2001_P_Till_3	MZTRF	2001	8	2	Canolat-Flax-Dur	0-25-0	CT	3491.4	16.8	80.04	38.08	47.67	4366.58	43.02	5.37	469	4998.54	1604.01	.	.	17.25	148.73	0.92
2001_P_Till_3	MZTRF	2001	11	2	Canolat-Flax-Dur	50-0-25	CT	3390.2	16.7	101.53	35.85	46.53	4445.29	40.34	5.8	451.99	4844.06	1568.79	.	.	22	132.64	0.85
2001_P_Till_3	MZTRF	2001	6	2	Wheat-Flax-Dur	50-25-0	CT	3466.4	16.4	80.52	34.91	47.21	4252.55	37.24	5.55	433.98	4478.11	1506.33	.	.	16.25	125.75	0.83
2001_P_Till_3	MZTRF	2001	4	2	Wheat-Flax-Dur	25-25-0	CT	3339.6	16.6	97.92	39.83	48.93	4629.66	41.91	5.95	469.44	5064.87	1657.49	.	.	14.5	116.77	0.84
2001_P_Till_3	MZTRF	2001	2	2	Wheat-Flax-Dur	0-25-0	CT	3635.8	16.7	93.7	37.32	46.39	4256.65	39.84	5.46	425.23	4624.55	1580.34	.	.	14.5	105.75	0.76
2001_P_Till_3	MZTRF	2001	12	2	Canolat-Flax-Dur	50-25-0	CT	3642.2	16.6	89.8	34.465	49.69	4472.93	40.97	5.345	468.675	4949.52	1607.45	.	.	26.25	132.53	1.16
2001_P_Till_3	MZTRF	2001	10	2	Canolat-Flax-Dur	25-25-0	CT	3520.4	16.7	81.41	32.16	38.24	4025.93	34.1	4.82	394.63	4834.81	1539.07	.	.	18.25	153.24	0.95
2001_P_Till_3	MZTRF	2001	1	2	Wheat-Flax-Dur	0-0-25	CT	3223.8	16.8	92.63	34.56	39.9	4193.97	36.08	4.7	390.07	4814.4	1570.94	.	.	12.75	128.64	0.81
2001_P_Till_3	MZTRF	2001	6	3	Wheat-Flax-Dur	50-25-0	ZT	3091.6	16.5	86.28	39.28	41.81	4467.83	27.32	5	354.65	4878.28	1748.02	.	.	19.25	144.8	1.42
2001_P_Till_3	MZTRF	2001	9	3	Canolat-Flax-Dur	25-0-25	ZT	2983	16.7	88.86	38.36	42.39	4269.82	29.61	4.75	359.93	4594.27	1603.19	.	.	19.25	152.26	1.38
2001_P_Till_3	MZTRF	2001	8	3	Canolat-Flax-Dur	0-25-0	ZT	3450	16.6	97.92	33.86	40.98	3891.94	28.58	4.5	401.28	4661.69	1495.43	.	.	12	110.99	0.84
2001_P_Till_3	MZTRF	2001	11	3	Canolat-Flax-Dur	50-0-25	ZT	3259.8	16.4	104.89	33.36	41.86	4189.29	28.48	4.29	387.22	4716.98	1578.91	.	.	16.25	120.29	1.13
2001_P_Till_3	MZTRF	2001	2	3	Wheat-Flax-Dur	0-25-0	ZT	3233.8	16.6	75.91	38.54	41.25	4088.06	29.2	5.12	347.77	4478.58	1608.64	.	.	16	117.32	1.01
2001_P_Till_3	MZTRF	2001	5	3	Wheat-Flax-Dur	50-0-25	ZT	3063.8	16.3	76.17	34.36	40.8	4338.22	30.86	4.88	333.06	4599.4	1654.23	.	.	19.75	124.63	1.09
2001_P_Till_3	MZTRF	2001	7	3	Canolat-Flax-Dur	0-0-25	ZT	3212.4	16.7	100.43	40.23	48.26	4561.01	41.16	5.69	391.37	5113.81	1822.14	.	.	14.75	109.03	0.89
2001_P_Till_3	MZTRF	2001	3	3	Wheat-Flax-Dur	25-0-25	ZT	3355.4	16.1	81.69	36.09	41.36	4289.87	36.88	5.49	360.47	4763.33	1660.9	.	.	17.5	115.57	0.87
2001_P_Till_3	MZTRF	2001	1	3	Wheat-Flax-Dur	0-0-25	ZT	3396	16.6	88.28	35.56	43.88	4225.02	37.08	5.33	379.98	4712.13	1692.01	.	.	15.25	112.22	0.79
2001_P_Till_3	MZTRF	2001	10	3	Canolat-Flax-Dur	25-25-0	ZT	3423.8	16.4	88.11	41.66	45.69	4223.39	35.93	5.29	360.11	4579.76	1627.18	.	.	16	116.06	0.87
2001_P_Till_3	MZTRF	2001	12	3	Canolat-Flax-Dur	50-25-0	ZT	3697.6	16.7	99.31	31.34	42.83	4171.63	35.29	5.05	364.56	4617.28	1628.39	.	.	15.25	113.02	0.76
2001_P_Till_3	MZTRF	2001	4	3	Wheat-Flax-Dur	25-25-0	ZT	3374.4	16.2	96.3	35.07	41.63	4093.96	35.2	5.27	390.72	4644.24	1523.31	.	.	14.5	127.92	0.91
2001_P_Till_3	MZTRF	2001	12	3	Canolat-Flax-Dur	50-25-0	CT	3243.6	16.5	88.62	27.83	42.98	4136.48	37.3	6.04	394.39	4591.22	1577.23	.	.	14.75	128.69	0.68
2001_P_Till_3	MZTRF	2001	10	3	Canolat-Flax-Dur	25-25-0	CT	3158.2	16.8	64.94	30.75	42.47	4169.4	38.9	5.5	372.75	4816.9	1653.73	.	.	14.25	127.05	0.64
2001_P_Till_3	MZTRF	2001	7	3	Canolat-Flax-Dur	0-0-25	CT	3250.2	16.7	90.96	32.65	40.78	4042.64	36.03	4.93	382.36	4613.62	1542.98	.	.	14.75	123.28	0.92
2001_P_Till_3	MZTRF	2001	11	3	Canolat-Flax-Dur	50-0-25	CT	3279.2	16.6	113.6	31.48	43.41	4274.83	36.75	4.46	408.51	4869.33	1580.85	.	.	13.25	122.17	0.76
2001_P_Till_3	MZTRF	2001	6	3	Wheat-Flax-Dur	50-25-0	CT	3382.6	16.6	87.1	31.56	39.14	3905.85	34.66	4.42	408.87	4543	1435.3	.	.	13.25	138.87	0.85
2001_P_Till_3	MZTRF	2001	1	3	Wheat-Flax-Dur	0-0-25	CT	3446.8	17	90.91	33.33	44.23	4132.82	39.72	4.91	451.62	4750.56	1510.91	.	.	15.5	142.51	0.97
2001_P_Till_3	MZTRF	2001	3	3	Wheat-Flax-Dur	25-0-25	CT	3467.8	16.9	81.69	33.14	44.3	3983.29	37.75	4.78	447.35	4702.89	1455.58	.	.	14.25	136.56	0.94
2001_P_Till_3	MZTRF	2001	8	3	Canolat-Flax-Dur	0-25-0	CT	3188.8	16.9	94.89	34.17	45.74	4222.79	43.2	5.11	473.26	5187.57	1541.54	.	.	13.5	146.21	0.83
2001_P_Till_3	MZTRF	2001	4	3	Wheat-Flax-Dur	25-25-0	CT	2747.8	16.9	69.69	29.52	41.79	3825.99	39.8	5.03	408.39	4563.8	1427.45	.	.	14.75	116.84	0.81
2001_P_Till_3	MZTRF	2001	2	3	Wheat-Flax-Dur	0-25-0	CT	3322.6	16.7	67.82	30.34	43.42	3948.76	40.35	4.95	411.77	4667.26	1473.06	.	.	14	83.6	1.39
2001_P_Till_3	MZTRF	2001	5	3	Wheat-Flax-Dur	50-0-25	CT	3352.6	16.8	67.03	27.89	42.13	3991.04	37.7	4.81	413.67	4702.16	1435.64	.	.	18.5	125.21	1.57
2001_P_Till_3	MZTRF	2001	9	3	Canolat-Flax-Dur	25-0-25	CT	3216.6	16.8	78.87	31.02	44.56	4216.5	37.37	4.94	447.41	4828.96	1525.71	.	.	15.75	100.11	1.59
2001_P_Till_3	MZTRF	2001	5	4	Wheat-Flax-Dur	50-0-25	CT	3052.2	16.8	78.69	36.46	48.59	4467.63	36.48	5.25	391.61	4658.32	1680.87	.	.	17.5	79.8	0.56
2001_P_Till_3	MZTRF	2001	2	4	Wheat-Flax-Dur	0-25-0	CT	3097.2	17	76.78	39.49	44.5	4336.2	36.92	5.58	385.5	4599.11	1617.21	.	.	14.75	68.87	1.47
2001_P_Till_3	MZTRF	2001	12	4	Canolat-Flax-Dur	50-25-0	CT	3175.6	16.8	92.67	33.17	45.46	4326.9	37.58	5.22	383.25	4598.23	1615.24	.	.	16.5	102.73	0.75
2001_P_Till_3	MZTRF	2001	8	4	Canolat-Flax-Dur	0-25-0	CT	3181.6	16.5	88.17	32.81	48.66	4184.63	39.25	5.51	386.39	4576.1	1600.3	.	.	19.25	107.88	0.65
2001_P_Till_3	MZTRF	2001	11	4	Canolat-Flax-Dur	50-0-25	CT	3106.8	16.7	101.6	28.94	46.5	4359.05	38.79	5.14	394.99	4687.79	1615.37	.	.	16.5	88.58	0.44
2001_P_Till_3	MZTRF	2001	10	4	Canolat-Flax-Dur	25-25-0	CT	3154.6	16.6	96.63	30.92	46.86	4454.32	42.24	5.89	422.68	4986.28	1658.51	.	.	16	87.43	0.65
2001_P_Till_3	MZTRF	2001	7	4	Canolat-Flax-Dur	0-0-25	CT	3160.8	16.8	78.62	28.91	45.65	4044.88	40.78	5.68	409.7	4501.27	1527.41	.	.	17	100.4	0.48
2001_P_Till_3	MZTRF	2001	1	4	Wheat-Flax-Dur	0-0-25	CT	3042.8	16.6	87.12	30.94	45.35	4032.86	40.02	5.7	385.26	4383.49	1528.01	.	.	12.75	106.46	0.59
2001_P_Till_3	MZTRF	2001	3	4	Wheat-Flax-Dur	25-0-25	CT	3022.4	16.6	85.24	28.92	44.87	3936.72	37.7	5.55	392.56	4331.42	1492.72	.	.	13.25	96.89	0.49
2001_P_Till_3	MZTRF	2001	4	4	Wheat-Flax-Dur	25-25-0	CT	2953.8	16.6	54.72	29.89	44.88	4006.35	38.69	5.72	405.96	4471.7	1496.13	.	.	15.5	91.84	0.64
2001_P_Till_3	MZTRF	2001	9	4	Canolat-Flax-Dur	25-0-25	CT	3367.6	16.8	101.57	30.965	48.445	4115.88	41.47	5.52	422.57	4481.29	1486.98	.	.	13	97.03	0.55
2001_P_Till_3	MZTRF	2001	6	4	Wheat-Flax-Dur	50-25-0	CT	3262.8	16.8	96.61	27.09	42.38	4164.09	39.04	5.24	443.12	4997.97	1523.24	.	.	13.5	101.45	0.48
2001_P_Till_3	MZTRF	2001	12	4	Canolat-Flax-Dur	50-25-0	ZT	3513	16	70.6	27.59	42.6	4086.57	41.54	5.55	403.66	4886	1526.46	.	.	16	106.45	0.62
2001_P_Till_3	MZTRF	2001	7	4	Canolat-Flax-Dur	0-0-25	ZT	3246.6	16.1	82.5	29.52	43.36	3896.79	39.68	5.41	401.89	4669.48	1489.31	.	.	12.75	104.45	0.52
2001_P_Till_3	MZTRF	2001	8	4	Canolat-Flax-Dur	0-25-0	ZT	3381.8	16.1	80.73	28.94	43.44	3822.12	37.53	5.59	377.6	4433.76	1450.96	.	.	19.5	96.33	0.57
2001_P_Till_3	MZTRF	2001	4	4	Wheat-Flax-Dur	25-25-0	ZT	2928.2	16.2	71.22	31.9	43.06	4088.59	37.48	5.69	381.39	4516.71	1512.79	.	.	13.75	91.32	0.49
2001_P_Till_3	MZTRF	2001	10	4	Canolat-Flax-Dur	25-25-0	ZT	3281	16.4	95.3	31.24	45.72	4297.38	43.08	5.68	429.28	4885.4	1586.28	.	.	12	87.53	0.51
2001_P_Till_3	MZTRF	2001	6	4	Wheat-Flax-Dur	50-25-0	ZT	3236.4	16.3	83.97	29.07	42.93	3990.41	37.85	5.81	371.49	4530.55	1459.78	.	.	19.25	131.1	0.67
2001_P_Till_3	MZTRF	2001	2	4	Wheat-Flax-Dur	0-25-0	ZT	3221	16.3	83.12	35.61	44.82	3944.35	42.41	6.11	423.96	4593.36	1533.54	.	.	9	101.24	0.49
2001_P_Till_3	MZTRF	2001	1	4	Wheat-Flax-Dur	0-0-25	ZT	3219.8	16	73.83	32.64	43.84	3860.02	37.97	5.8	375.19	4372.53	1450.33	.	.	12.25	98.98	0.5
2001_P_Till_3	MZTRF	2001	3	4	Wheat-Flax-Dur	25-0-25	ZT	3062	16.5	96.22	30.01	45.58	4058.93	38.41	5.84	384.94	4544.85	1558.23	.	.	14.25	96.89	0.55
2001_P_Till_3	MZTRF	2001	11	4	Canolat-Flax-Dur	50-0-25	ZT	3285.6	16.6	97.8	30.02	42.91	4193.12	37.1	5.46	375.58	4500.04	1517.49	.	.	19.25	98.29	0.8
2001_P_Till_3	MZTRF	2001	5	4	Wheat-Flax-Dur	50-0-25	ZT	3004.6	16.3	83.07	36.51	46.37	4491.45	39.76	5.52	407.5	4788.17	1602.35	.	.	16.5	104.68	0.69
2001_P_Till_3	MZTRF	2001	9	4	Canolat-Flax-Dur	25-0-25	ZT	2738	16.4	71.25	36.95	45.71	4347.64	43.11	5.92	377.45	4636.32	1548.38	.	.	18	115.4	0.86
2002_P_Till_3	BRC-North	2002	5	1	Wheat-Flax-Dur	50-0-25	CT	2720	15.1	65	28.3	39.9	3260	34.4	5.22	301	3830	1600	7.1	430	13.5	106.44	1.66
2002_P_Till_3	BRC-North	2002	7	1	Canolat-Flax-Dur	0-0-25	CT	3197.4	14.6	60	30.5	40.1	3200	36.7	4.96	278	4030	1610	7.31	852	13.75	86.36	0.76
2002_P_Till_3	BRC-North	2002	6	1	Wheat-Flax-Dur	50-25-0	CT	3118.4	14.2	70	26.8	37.1	3010	32.1	7.78	283	3620	1730	7.36	1936	17.25	110.67	1.62
2002_P_Till_3	BRC-North	2002	3	1	Wheat-Flax-Dur	25-0-25	CT	3026.4	14.1	49	27	40.4	3095	35.3	5.26	294	4470	1810	7.49	1964	12.25	74.68	0.76
2002_P_Till_3	BRC-North	2002	10	1	Canolat-Flax-Dur	25-25-0	CT	3191.2	14.5	60	28.4	38.3	3110	33.8	4.75	279	3780	1550	7.82	811	15.25	87.07	0.82
2002_P_Till_3	BRC-North	2002	9	1	Canolat-Flax-Dur	25-0-25	CT	3270.4	14.3	58	26.4	40.4	3320	34.6	4.95	270	3900	1700	7.87	622	15	102.22	0.72
2002_P_Till_3	BRC-North	2002	12	1	Canolat-Flax-Dur	50-25-0	CT	3520.6	14.7	96	26.7	40.6	3515	36	4.96	277	3910	1730	7.91	458	16	106.77	1.05
2002_P_Till_3	BRC-North	2002	1	1	Wheat-Flax-Dur	0-0-25	CT	3277.6	14.5	120	25.5	36.7	3390	30.7	4.61	294	3770	1550	7.89	421	10	141.67	1.88
2002_P_Till_3	BRC-North	2002	2	1	Wheat-Flax-Dur	0-25-0	CT	3357.2	14.9	134	31.3	43.6	3910	33	5.32	346	4050	1730	7.87	357	13.25	139.39	0.81
2002_P_Till_3	BRC-North	2002	4	1	Wheat-Flax-Dur	25-25-0	CT	3468.6	15	169	31.3	46.3	4455	35.7	5.03	353	4325	1782	7.79	340	15.5	150.99	1.24
2002_P_Till_3	BRC-North	2002	11	1	Canolat-Flax-Dur	50-0-25	CT	3766.8	14.9	198	25.6	44.7	4440	35.4	4.58	327	3980	1690	7.17	327	19.25	134.98	1.19
2002_P_Till_3	BRC-North	2002	8	1	Canolat-Flax-Dur	0-25-0	CT	3793.4	14.7	174	30.6	43.8	4260	36.5	4.73	347	4100	1720	7.26	349	22	172.62	1.14
2002_P_Till_3	BRC-North	2002	2	1	Wheat-Flax-Dur	0-25-0	ZT	2760.6	14.3	74	29.2	36	2690	27.1	5.06	417	3590	1440	7.41	276	8.25	106.01	1.09
2002_P_Till_3	BRC-North	2002	10	1	Canolat-Flax-Dur	25-25-0	ZT	2885	14.2	65	24.5	32.8	2780	29.2	5.16	313	3660	1510	7.49	336	9	115.96	0.58
2002_P_Till_3	BRC-North	2002	3	1	Wheat-Flax-Dur	25-0-25	ZT	2680.4	14.4	75	24.6	35.2	2760	27.9	5.29	337	3600	2000	7.7	343	8.25	91.41	0.84
2002_P_Till_3	BRC-North	2002	11	1	Canolat-Flax-Dur	50-0-25	ZT	2742.6	14.3	63	23.6	34.3	3070	30.4	5.27	310	3700	1520	7.78	308	15.25	92.85	0.56
2002_P_Till_3	BRC-North	2002	4	1	Wheat-Flax-Dur	25-25-0	ZT	2253.8	14.3	50	24.7	35.3	2760	28.6	5.19	321	3580	1520	7.82	328	11.5	71.74	0.4
2002_P_Till_3	BRC-North	2002	12	1	Canolat-Flax-Dur	50-25-0	ZT	2561.6	14.5	62	22.6	33.7	3030	28.2	5.27	318	3700	1450	7.81	416	15.5	92.08	0.69
2002_P_Till_3	BRC-North	2002	8	1	Canolat-Flax-Dur	0-25-0	ZT	2493.6	14.6	74	26.7	37.6	3050	31.5	5.4	331	3570	1505	7.85	365	12.25	110.33	0.79
2002_P_Till_3	BRC-North	2002	7	1	Canolat-Flax-Dur	0-0-25	ZT	2717.8	14.5	101	23.1	34.3	3080	28.3	5.25	320	3485	1470	7.85	377	12.25	120.6	0.99
2002_P_Till_3	BRC-North	2002	1	1	Wheat-Flax-Dur	0-0-25	ZT	2665.6	14.6	101	24	33.2	2940	26.6	5.12	321	3540	1500	7.83	303	8.25	95.42	0.51
2002_P_Till_3	BRC-North	2002	5	1	Wheat-Flax-Dur	50-0-25	ZT	2954	14.3	120	23.9	37	3460	29.7	5.42	320	3910	1640	7.82	271	11.5	119.41	0.85
2002_P_Till_3	BRC-North	2002	6	1	Wheat-Flax-Dur	50-25-0	ZT	3001.6	14.3	110	24.6	33.9	3420	29.1	5.26	314	3650	1600	7.81	242	16.5	136.53	0.72
2002_P_Till_3	BRC-North	2002	9	1	Canolat-Flax-Dur	25-0-25	ZT	3152.8	14.3	153	25.5	38.2	3630	31.4	5.52	296	3890	1640	7.79	252	9	100.52	0.63
2002_P_Till_3	BRC-North	2002	7	2	Canolat-Flax-Dur	0-0-25	ZT	3261.8	14.8	73	32	36.8	3030	29.8	5.27	331	4220	1715	7.64	411	13	111.75	1.02
2002_P_Till_3	BRC-North	2002	9	2	Canolat-Flax-Dur	25-0-25	ZT	3035.6	15	60	28	39.3	3530	31	5.29	338	4030	1590	7.71	399	13	116.69	1.15
2002_P_Till_3	BRC-North	2002	5	2	Wheat-Flax-Dur	50-0-25	ZT	2862.6	14.4	52	24	34.9	3060	29.7	5.28	310	3800	1585	7.77	344	13.75	89.94	0.95
2002_P_Till_3	BRC-North	2002	6	2	Wheat-Flax-Dur	50-25-0	ZT	2860.2	14.3	59	22.3	34	2920	28	5.17	277	3800	1425	7.79	427	12	84.96	0.96
2002_P_Till_3	BRC-North	2002	3	2	Wheat-Flax-Dur	25-0-25	ZT	2798	14.2	60	24.8	35.3	2980	30	5.27	297	4070	1510	7.68	522	13.75	92.66	0.89
2002_P_Till_3	BRC-North	2002	12	2	Canolat-Flax-Dur	50-25-0	ZT	3326	14.6	74	24.7	37.4	3270	33.4	4.94	281	4000	1565	7.82	494	12.5	100.95	1.16
2002_P_Till_3	BRC-North	2002	11	2	Canolat-Flax-Dur	50-0-25	ZT	3302.2	14.5	88	26.5	38.1	3010	33.8	4.79	371	4010	1430	7.5	455	16	132.19	0.96
2002_P_Till_3	BRC-North	2002	1	2	Wheat-Flax-Dur	0-0-25	ZT	2636.4	14.5	65	31.1	38.8	2980	28.9	4.72	340	4020	1570	7.71	294	8.5	117.59	0.86
2002_P_Till_3	BRC-North	2002	2	2	Wheat-Flax-Dur	0-25-0	ZT	2753.8	14.8	79	31.2	37.1	2900	26.4	4.74	377	3910	1340	7.68	360	11.5	149.98	1.12
2002_P_Till_3	BRC-North	2002	4	2	Wheat-Flax-Dur	25-25-0	ZT	3177.4	14.3	130	29.4	38.2	3415	27.1	4.72	409	3950	1450	7.75	284	12.25	117.7	1.24
2002_P_Till_3	BRC-North	2002	8	2	Canolat-Flax-Dur	0-25-0	ZT	3484.8	14.6	165	33.9	43.1	3800	29.9	7.92	469	4230	1510	7.72	342	10.75	176.61	1.11
2002_P_Till_3	BRC-North	2002	10	2	Canolat-Flax-Dur	25-25-0	ZT	3448	14.7	174	36.2	47.6	3850	30.8	4.86	390	4100	1570	7.71	335	10.75	172.69	1.28
2002_P_Till_3	BRC-North	2002	9	2	Canolat-Flax-Dur	25-0-25	CT	3082	14.9	202	28.9	39.4	3825	30.7	4.92	363	4010	1590	7.74	312	11.25	137.54	0.74
2002_P_Till_3	BRC-North	2002	3	2	Wheat-Flax-Dur	25-0-25	CT	3109.2	15.2	188	26.7	37.4	3950	28.3	4.54	286	3800	1540	7.73	317	10.5	141.5	0.9
2002_P_Till_3	BRC-North	2002	7	2	Canolat-Flax-Dur	0-0-25	CT	3130.2	15	192	26.6	39.1	3450	32.3	4.93	283	3820	1590	7.25	301	9.5	143.21	0.59
2002_P_Till_3	BRC-North	2002	5	2	Wheat-Flax-Dur	50-0-25	CT	3115.6	14.8	146	25.7	37.6	3550	33.2	4.99	321	3885	1510	7.15	365	13.75	150.2	0.89
2002_P_Till_3	BRC-North	2002	8	2	Canolat-Flax-Dur	0-25-0	CT	2752.8	14.8	138	27.2	38.3	3415	32.8	5.11	300	3750	1450	7.3	377	15	114.72	1.28
2002_P_Till_3	BRC-North	2002	11	2	Canolat-Flax-Dur	50-0-25	CT	3147.4	14.8	208	22.2	37.2	3620	29.2	4.88	284	3780	1590	7.45	330	14	109.52	0.66
2002_P_Till_3	BRC-North	2002	6	2	Wheat-Flax-Dur	50-25-0	CT	3067.6	15	188	24.2	38.4	3615	30.9	5.01	313	3890	1610	7.46	384	12.5	117.53	0.79
2002_P_Till_3	BRC-North	2002	4	2	Wheat-Flax-Dur	25-25-0	CT	3076.4	14.9	152	25.4	39.4	3690	30	4.98	269	4240	1515	7.53	338	14.5	122.83	1.2
2002_P_Till_3	BRC-North	2002	2	2	Wheat-Flax-Dur	0-25-0	CT	3022.8	14.8	148	27.4	38.3	3395	29.8	4.99	314	3830	1500	7.58	306	11	123	0.71
2002_P_Till_3	BRC-North	2002	12	2	Canolat-Flax-Dur	50-25-0	CT	2892	14.8	174	23.4	39.1	3960	32.6	5.16	271	4140	1610	7.61	334	12.25	130.33	0.7
2002_P_Till_3	BRC-North	2002	10	2	Canolat-Flax-Dur	25-25-0	CT	2809	14.8	138	23.7	38	3670	31.8	5.3	266	3920	1750	7.64	329	12.5	128.25	0.67
2002_P_Till_3	BRC-North	2002	1	2	Wheat-Flax-Dur	0-0-25	CT	3053	14.9	151	28.6	40.7	4090	33.3	5.798	286	4040	1650	7.67	291	11	120.32	0.97
2002_P_Till_3	BRC-North	2002	6	3	Wheat-Flax-Dur	50-25-0	ZT	3384.4	14.9	64	32.6	37	4050	34.2	5.55	328	4470	1500	7.17	297	8.75	116.49	0.83
2002_P_Till_3	BRC-North	2002	9	3	Canolat-Flax-Dur	25-0-25	ZT	3137.2	14.5	61	27.2	31.8	3250	26.4	5.85	295	3785	1605	7.36	383	15.5	95.97	1.57
2002_P_Till_3	BRC-North	2002	8	3	Canolat-Flax-Dur	0-25-0	ZT	2773.2	14.3	50	25	32.9	3915	28.4	6.3	267	3890	1450	7.57	387	21.5	99.26	0.95
2002_P_Till_3	BRC-North	2002	11	3	Canolat-Flax-Dur	50-0-25	ZT	2857	14	38	22.4	34.5	3320	25.5	5.88	235	3880	1460	7.64	475	15.25	75.94	0.91
2002_P_Till_3	BRC-North	2002	2	3	Wheat-Flax-Dur	0-25-0	ZT	1993	13.8	37	24.5	31.9	3570	23.1	6.71	263	3860	1590	7.75	507	14	70.42	1.01
2002_P_Till_3	BRC-North	2002	5	3	Wheat-Flax-Dur	50-0-25	ZT	2411.2	14.1	36	22.4	32.3	3260	23.9	5.91	299	3740	1330	8.01	316	12.5	66.04	0.55
2002_P_Till_3	BRC-North	2002	7	3	Canolat-Flax-Dur	0-0-25	ZT	2733.6	14.3	44	24.8	34.7	3200	27.1	6.21	339	3800	1520	8.05	422	12	74.01	0.57
2002_P_Till_3	BRC-North	2002	3	3	Wheat-Flax-Dur	25-0-25	ZT	2662.6	14	41	23.3	32.5	3140	23.9	5.84	317	3650	1450	8.08	418	18.25	82.25	0.74
2002_P_Till_3	BRC-North	2002	1	3	Wheat-Flax-Dur	0-0-25	ZT	2653.8	14.1	45	25.4	33.4	3270	25.2	5.93	347	3640	1455	8.11	323	10	76.42	0.66
2002_P_Till_3	BRC-North	2002	10	3	Canolat-Flax-Dur	25-25-0	ZT	2816.4	14.2	62	24.9	37.1	3400	30.4	6.52	326	3990	1620	8.05	420	15.25	96.41	0.61
2002_P_Till_3	BRC-North	2002	12	3	Canolat-Flax-Dur	50-25-0	ZT	3370.6	14.5	74	25.8	39.1	3520	31.5	6.33	325	3890	1600	7.75	315	11.5	104.45	0.61
2002_P_Till_3	BRC-North	2002	4	3	Wheat-Flax-Dur	25-25-0	ZT	3412.2	14	59	28.5	35.7	3255	28.2	6.07	299	3635	1455	7.78	435	10.75	103.3	1.16
2002_P_Till_3	BRC-North	2002	12	3	Canolat-Flax-Dur	50-25-0	CT	3245.2	14.8	153	28.8	41.1	3955	31.7	5.89	380	4050	1625	7.86	324	15.75	142.49	0.94
2002_P_Till_3	BRC-North	2002	10	3	Canolat-Flax-Dur	25-25-0	CT	3198.4	14.7	127	29.4	38.5	3380	27.7	5.38	351	3930	1530	7.86	415	11	110.93	0.7
2002_P_Till_3	BRC-North	2002	7	3	Canolat-Flax-Dur	0-0-25	CT	3197.8	14.7	149	25.2	36.4	3430	27.6	4.97	303	3630	1500	7.88	324	11.25	116.8	0.77
2002_P_Till_3	BRC-North	2002	11	3	Canolat-Flax-Dur	50-0-25	CT	3344.6	14.7	164	24.4	36.5	3780	29.3	5.18	318	3940	1640	7.89	295	14	113.36	0.86
2002_P_Till_3	BRC-North	2002	6	3	Wheat-Flax-Dur	50-25-0	CT	3257.8	14.5	118	25.2	35.9	3440	26.9	5.34	317	3550	1510	7.8	355	10	129.57	0.62
2002_P_Till_3	BRC-North	2002	1	3	Wheat-Flax-Dur	0-0-25	CT	2886.4	14.5	124	25	34.9	3440	26.4	5.31	318	3710	1480	7.82	335	9.25	140.36	0.69
2002_P_Till_3	BRC-North	2002	3	3	Wheat-Flax-Dur	25-0-25	CT	2964.4	14.5	129	22.4	33.1	3385	27.3	4.96	301	3560	1470	7.83	311	11.25	115.66	0.76
2002_P_Till_3	BRC-North	2002	8	3	Canolat-Flax-Dur	0-25-0	CT	2737.4	14.4	107	23.7	33.6	3360	28.7	5.36	284	3790	1430	7.82	301	12.25	117.68	0.77
2002_P_Till_3	BRC-North	2002	4	3	Wheat-Flax-Dur	25-25-0	CT	2974.2	14.36	129	24.7	35.6	3125	27.8	5.48	298	3820	1480	7.75	253	14.5	113.54	0.4
2002_P_Till_3	BRC-North	2002	2	3	Wheat-Flax-Dur	0-25-0	CT	2552.8	14.3	105	23.6	34.3	3195	26.7	5.27	285	3710	1385	7.71	291	12.75	108.67	0.61
2002_P_Till_3	BRC-North	2002	5	3	Wheat-Flax-Dur	50-0-25	CT	2317.6	14.6	135	22.7	38.4	3445	30.8	5.46	355	3750	1450	7.74	287	11.25	104.03	0.63
2002_P_Till_3	BRC-North	2002	9	3	Canolat-Flax-Dur	25-0-25	CT	2441.8	14.4	114	27.1	37.8	3390	29.1	5.59	363	3760	1410	7.76	282	11.75	134.12	0.69
2002_P_Till_3	BRC-North	2002	5	4	Wheat-Flax-Dur	50-0-25	CT	2866.8	15.7	85	33	41.4	4375	31.9	5.9	504	4130	1820	7.71	381	16.5	107.81	0.97
2002_P_Till_3	BRC-North	2002	2	4	Wheat-Flax-Dur	0-25-0	CT	1983.4	15.8	94	30.1	42.4	4535	29.2	5.71	512	4060	1610	7.76	400	20.75	89.21	1.04
2002_P_Till_3	BRC-North	2002	12	4	Canolat-Flax-Dur	50-25-0	CT	2460	15.6	102	29.5	43.8	4480	32.6	5.85	403	4070	1620	7.8	433	20.75	81.04	0.97
2002_P_Till_3	BRC-North	2002	8	4	Canolat-Flax-Dur	0-25-0	CT	3135.8	15	82	27.3	39.4	4290	28.5	5.75	285	3920	1705	7.89	447	16.5	58.95	0.54
2002_P_Till_3	BRC-North	2002	11	4	Canolat-Flax-Dur	50-0-25	CT	3218.2	14.8	77	27.8	41.1	3965	33.5	5.54	285	3960	1670	7.64	791	19.5	64	0.83
2002_P_Till_3	BRC-North	2002	10	4	Canolat-Flax-Dur	25-25-0	CT	3671.8	14.9	58	29.6	42.7	4035	38.9	5.74	270	4110	1670	7.76	718	17.25	85.17	0.65
2002_P_Till_3	BRC-North	2002	7	4	Canolat-Flax-Dur	0-0-25	CT	3559.8	14.5	54	30.2	40.6	3725	34.7	5.44	288	4270	1690	7.76	1021	15.75	81.04	0.97
2002_P_Till_3	BRC-North	2002	1	4	Wheat-Flax-Dur	0-0-25	CT	3434.4	14.6	57	30.3	42.9	3680	36.3	5.56	293	4055	1685	7.75	1285	11.5	68.57	0.48
2002_P_Till_3	BRC-North	2002	3	4	Wheat-Flax-Dur	25-0-25	CT	3114.6	14.7	102	23.8	38.8	3765	34.2	5.52	262	3820	1290	7.96	393	16.5	119.65	0.79
2002_P_Till_3	BRC-North	2002	4	4	Wheat-Flax-Dur	25-25-0	CT	2936	14.7	110	22.7	40.6	4305	34.7	5.51	265	3920	1950	7.92	437	14.75	87.74	0.58
2002_P_Till_3	BRC-North	2002	9	4	Canolat-Flax-Dur	25-0-25	CT	3450.6	14.7	130	22.2	40.7	4155	35.3	5.27	257	3745	1700	7.97	312	12.25	80.74	0.48
2002_P_Till_3	BRC-North	2002	6	4	Wheat-Flax-Dur	50-25-0	CT	3209.2	14.2	111	21.7	37.3	4370	32.4	5.44	272	4130	1770	7.95	309	12	109.16	0.64
2002_P_Till_3	BRC-North	2002	12	4	Canolat-Flax-Dur	50-25-0	ZT	3277.6	14.3	68	24.3	37.4	2770	29.4	5.28	269	3590	1710	7.86	382	12	94.79	0.76
2002_P_Till_3	BRC-North	2002	7	4	Canolat-Flax-Dur	0-0-25	ZT	3023.6	14.4	58	26.2	37.3	2670	31.8	5.32	289	3590	1850	7.91	393	12.25	73.82	0.53
2002_P_Till_3	BRC-North	2002	8	4	Canolat-Flax-Dur	0-25-0	ZT	2848.6	13.9	56	22.2	34.4	2615	28.8	5.24	287	3710	1640	7.86	352	9.5	61.29	0.5
2002_P_Till_3	BRC-North	2002	4	4	Wheat-Flax-Dur	25-25-0	ZT	2552.6	13.7	46	22.3	39.8	2670	28.5	5.09	270	3740	1530	7.96	285	10	88.63	0.43
2002_P_Till_3	BRC-North	2002	10	4	Canolat-Flax-Dur	25-25-0	ZT	2814.8	14.1	53	25	36.5	2765	32.7	5.61	309	3650	1510	7.93	444	10.5	77.57	0.46
2002_P_Till_3	BRC-North	2002	6	4	Wheat-Flax-Dur	50-25-0	ZT	2675.8	13.9	42	26	36.3	3010	31.8	6.31	322	3905	1480	8.03	305	9.5	84.16	0.47
2002_P_Till_3	BRC-North	2002	2	4	Wheat-Flax-Dur	0-25-0	ZT	2364.8	13.9	43	25.2	30.2	2495	29.8	6	305	3790	1740	7.94	295	7.5	74.86	0.45
2002_P_Till_3	BRC-North	2002	1	4	Wheat-Flax-Dur	0-0-25	ZT	2452	14.3	45	29.6	44.6	2700	33	6.05	315	3800	1930	7.95	312	11.75	66.29	0.47
2002_P_Till_3	BRC-North	2002	3	4	Wheat-Flax-Dur	25-0-25	ZT	2331	14.3	43	24.5	33	2685	28.9	5.59	289	3710	1650	8.02	322	10	54.92	0.64
2002_P_Till_3	BRC-North	2002	11	4	Canolat-Flax-Dur	50-0-25	ZT	2622.2	14.4	60	22.4	33.8	2600	34.1	6.05	253	3550	1610	8.04	373	10.75	73.28	0.5
2002_P_Till_3	BRC-North	2002	5	4	Wheat-Flax-Dur	50-0-25	ZT	2642.8	14.3	60	25.1	31.9	2615	31	6	245	3390	2900	8.02	357	9.5	96.09	0.59
2002_P_Till_3	BRC-North	2002	9	4	Canolat-Flax-Dur	25-0-25	ZT	2452.4	14.3	52	27	34.2	2610	32.9	5.68	274	3730	1710	7.97	459	10.75	74.33	0.43
2002_P_Till_3	MZTRF	2002	5	1	Wheat-Flax-Dur	50-0-25	CT	4194.8	14.1	90	30.1	33.1	3260	25	4.87	280	4110	1680	7.15	2854	13.75	119.47	1.03
2002_P_Till_3	MZTRF	2002	7	1	Canolat-Flax-Dur	0-0-25	CT	4086.4	14	96	36.1	35.6	3110	22.4	5.35	315	3880	1300	7.28	1567	11.25	139.25	1.03
2002_P_Till_3	MZTRF	2002	6	1	Wheat-Flax-Dur	50-25-0	CT	4170.2	14.2	99	39.4	36.6	3480	23.3	5.72	352	3990	1425	7.35	1089	10	147.07	0.86
2002_P_Till_3	MZTRF	2002	3	1	Wheat-Flax-Dur	25-0-25	CT	4332.6	13.9	102	37	35.5	3525	26.3	6.28	306	4490	1600	7.45	682	13.5	159.58	1.08
2002_P_Till_3	MZTRF	2002	10	1	Canolat-Flax-Dur	25-25-0	CT	3643	14.5	86	38.6	36.1	3330	24.5	5.8	318	4500	1580	7.49	480	13.25	172.38	1.17
2002_P_Till_3	MZTRF	2002	9	1	Canolat-Flax-Dur	25-0-25	CT	3830.2	14.7	94	40.2	36.5	3830	28.3	6.26	344	4860	1630	7.38	668	13.5	153.87	1.22
2002_P_Till_3	MZTRF	2002	12	1	Canolat-Flax-Dur	50-25-0	CT	3922.4	14.8	91	38.5	37.1	3370	26.2	5.49	346	4350	1540	7.4	618	9.75	147.96	0.86
2002_P_Till_3	MZTRF	2002	1	1	Wheat-Flax-Dur	0-0-25	CT	2882.2	14.5	77	33	36.1	3140	20.7	6.02	362	4670	1470	7.51	389	10.75	138.88	0.91
2002_P_Till_3	MZTRF	2002	2	1	Wheat-Flax-Dur	0-25-0	CT	2991.2	14.7	67	36.4	36.4	3080	21.4	5.8	378	4450	1370	7.52	391	11.5	148.05	0.87
2002_P_Till_3	MZTRF	2002	4	1	Wheat-Flax-Dur	25-25-0	CT	2602.6	14.7	81	36.1	36.3	3235	20.7	6.01	420	4800	1400	7.56	377	11	161.6	0.79
2002_P_Till_3	MZTRF	2002	11	1	Canolat-Flax-Dur	50-0-25	CT	3390	14.3	100	30.4	34.9	3575	20.1	5.65	390	4750	1390	7.02	337	12	156.09	0.92
2002_P_Till_3	MZTRF	2002	8	1	Canolat-Flax-Dur	0-25-0	CT	3189.2	14.4	100	37	36.4	3520	21.8	6	395	4840	1450	7.23	369	12	143.12	1.1
2002_P_Till_3	MZTRF	2002	2	1	Wheat-Flax-Dur	0-25-0	ZT	3689.2	14.3	90	42.8	78.5	3890	18.2	5.9	425	5060	1600	7.28	319	10	190.46	1.67
2002_P_Till_3	MZTRF	2002	10	1	Canolat-Flax-Dur	25-25-0	ZT	3913	14.2	115	44.3	40.5	4225	17	6.06	462	5340	1590	7.28	373	16.5	180.94	2
2002_P_Till_3	MZTRF	2002	3	1	Wheat-Flax-Dur	25-0-25	ZT	3663.8	14.2	105	40.7	40.1	3980	16.2	5.85	456	5160	1500	7.33	310	12.25	189.44	1.84
2002_P_Till_3	MZTRF	2002	11	1	Canolat-Flax-Dur	50-0-25	ZT	3334	14.5	125	45	45	4270	17.8	5.44	470	5200	1550	7.35	261	12.75	160.38	1.88
2002_P_Till_3	MZTRF	2002	4	1	Wheat-Flax-Dur	25-25-0	ZT	3540.4	14.3	62	43.1	39.2	3860	14.4	5.735	430	4960	1390	7.34	283	11	171.78	2.1
2002_P_Till_3	MZTRF	2002	12	1	Canolat-Flax-Dur	50-25-0	ZT	3162.8	14.4	72	46.8	39.1	4555	17.5	5.6	458	5270	1500	7.23	341	15.5	187.46	1.93
2002_P_Till_3	MZTRF	2002	8	1	Canolat-Flax-Dur	0-25-0	ZT	3276	14.7	58	49.7	40.3	4150	24.2	5.334	418	4850	1655	7.04	399	14.25	192.39	2.09
2002_P_Till_3	MZTRF	2002	7	1	Canolat-Flax-Dur	0-0-25	ZT	3497.2	14.8	72	48.8	40.7	3640	25.5	6.08	432	4900	1440	7.17	323	13.25	172.42	2.66
2002_P_Till_3	MZTRF	2002	1	1	Wheat-Flax-Dur	0-0-25	ZT	3470.4	14.4	53	43	36.5	3370	20.6	5.72	376	4630	1300	7.21	244	11.25	151.08	2.27
2002_P_Till_3	MZTRF	2002	5	1	Wheat-Flax-Dur	50-0-25	ZT	3718.8	14.1	56	42.4	37.5	3515	23.6	5.5	370	4640	1350	7.2	267	11.25	153.54	2
2002_P_Till_3	MZTRF	2002	6	1	Wheat-Flax-Dur	50-25-0	ZT	3506.2	14.5	49	45.4	38.1	3535	23.7	5.292	411	4960	1350	7.24	265	10	149.23	1.85
2002_P_Till_3	MZTRF	2002	9	1	Canolat-Flax-Dur	25-0-25	ZT	3366	14.6	84	43.5	39.9	3775	24.8	5.08	405	4530	1440	7.15	355	14.25	149.03	1.9
2002_P_Till_3	MZTRF	2002	7	2	Canolat-Flax-Dur	0-0-25	ZT	3823.2	14.4	79	30	36.6	3100	32.2	5.137	262	4520	1240	7.1	1159	9.5	140.74	0.96
2002_P_Till_3	MZTRF	2002	9	2	Canolat-Flax-Dur	25-0-25	ZT	3776	14.3	71	29	36	2550	29.8	5.58	263	4295	1220	7.33	538	12.5	128.64	0.83
2002_P_Till_3	MZTRF	2002	5	2	Wheat-Flax-Dur	50-0-25	ZT	4085.2	14.1	86	27.5	36.5	3070	27.6	5.162	340	4220	1230	7.46	375	10.25	131.86	0.88
2002_P_Till_3	MZTRF	2002	6	2	Wheat-Flax-Dur	50-25-0	ZT	3920.4	13.6	72	30.2	35.5	3340	27.2	5.549	313	4415	1250	7.49	370	10.5	150.49	0.84
2002_P_Till_3	MZTRF	2002	3	2	Wheat-Flax-Dur	25-0-25	ZT	3951	13.8	69	31.8	37	3400	30.6	5.707	318	4360	1230	7.19	280	9.5	160.1	0.93
2002_P_Till_3	MZTRF	2002	12	2	Canolat-Flax-Dur	50-25-0	ZT	3841.8	13.8	65	33.7	38	3840	34.2	5.824	336	4480	1290	7.31	322	10	158.25	0.64
2002_P_Till_3	MZTRF	2002	11	2	Canolat-Flax-Dur	50-0-25	ZT	4032.2	14	65	26	40.5	3405	33.4	5.432	339	4180	1180	7.33	387	13	150.97	0.7
2002_P_Till_3	MZTRF	2002	1	2	Wheat-Flax-Dur	0-0-25	ZT	2971.6	13.8	48	30.2	34	2680	27.2	4.978	364	3990	1170	7.42	328	8.25	159.49	0.69
2002_P_Till_3	MZTRF	2002	2	2	Wheat-Flax-Dur	0-25-0	ZT	3289.6	14.3	52	32.6	39.5	3365	34.6	5.473	404	4310	1120	7.46	361	9.25	167.13	0.7
2002_P_Till_3	MZTRF	2002	4	2	Wheat-Flax-Dur	25-25-0	ZT	3480.6	14.1	50	34.9	50.8	3355	34	5.67	365	4505	1260	7.52	367	10.25	165.25	0.83
2002_P_Till_3	MZTRF	2002	8	2	Canolat-Flax-Dur	0-25-0	ZT	3488	14.5	78	39	38.1	3245	31	5.459	401	4360	1160	7.53	389	10.75	169.05	0.87
2002_P_Till_3	MZTRF	2002	10	2	Canolat-Flax-Dur	25-25-0	ZT	3527.8	14.4	73	33.5	36	3020	29.8	5.468	394	4260	1160	7.55	355	11.5	169.93	0.95
2002_P_Till_3	MZTRF	2002	9	2	Canolat-Flax-Dur	25-0-25	CT	3490	14.2	90	29.9	35.6	3465	31.4	5.869	387	4555	1570	7.64	288	7.75	105.73	0.53
2002_P_Till_3	MZTRF	2002	3	2	Wheat-Flax-Dur	25-0-25	CT	2789.4	14.5	79	34	37.7	3480	28.5	6.155	402	4770	1490	7.6	293	9	111.66	0.73
2002_P_Till_3	MZTRF	2002	7	2	Canolat-Flax-Dur	0-0-25	CT	3412	14.7	98	35	35.6	3740	26.2	5.62	412	4750	1470	7.07	345	12.75	169.23	1.05
2002_P_Till_3	MZTRF	2002	5	2	Wheat-Flax-Dur	50-0-25	CT	3293.8	14.9	104	36.7	36.5	5720	22.6	6.15	408	4810	1540	7.19	332	13.5	174.31	1.27
2002_P_Till_3	MZTRF	2002	8	2	Canolat-Flax-Dur	0-25-0	CT	3194.6	14.8	113	37.7	35.6	3680	18.5	5.385	393	4810	1470	7.27	300	11.25	133.47	1.05
2002_P_Till_3	MZTRF	2002	11	2	Canolat-Flax-Dur	50-0-25	CT	2989	15.2	148	36.2	36.6	4015	18.7	5.417	398	4990	1730	7.24	336	16	164.16	1.36
2002_P_Till_3	MZTRF	2002	6	2	Wheat-Flax-Dur	50-25-0	CT	3048.6	14.9	99	39.6	37.4	4380	18.8	4.99	410	4970	1580	7.3	375	15	146.08	1.44
2002_P_Till_3	MZTRF	2002	4	2	Wheat-Flax-Dur	25-25-0	CT	3193.8	15.2	79	43.5	39.3	3915	20.5	4.64	466	5100	1465	7.3	346	15	166.18	1.72
2002_P_Till_3	MZTRF	2002	2	2	Wheat-Flax-Dur	0-25-0	CT	3067.6	15.1	104	48	40.2	4050	22.6	5.18	461	3970	1270	7.27	403	11	149.56	1.76
2002_P_Till_3	MZTRF	2002	12	2	Canolat-Flax-Dur	50-25-0	CT	3473.8	14.9	80	50.4	40.4	4600	29.3	5.66	455	4950	1540	7.24	412	19	181.19	2.15
2002_P_Till_3	MZTRF	2002	10	2	Canolat-Flax-Dur	25-25-0	CT	3320.8	15	101	48.9	41.5	4320	30.8	5.35	403	4830	1520	7.29	340	14.5	165.38	2.13
2002_P_Till_3	MZTRF	2002	1	2	Wheat-Flax-Dur	0-0-25	CT	3388.2	15.1	59	48.4	38.8	4265	30.8	5.4	448	4625	1510	7.29	377	12.25	129.03	1.47
2002_P_Till_3	MZTRF	2002	6	3	Wheat-Flax-Dur	50-25-0	ZT	3211	14.4	41	31.6	35	3090	38.6	5.14	393	4140	1270	7.1	407	10	143.66	0.8
2002_P_Till_3	MZTRF	2002	9	3	Canolat-Flax-Dur	25-0-25	ZT	3511.6	14.5	54	31.4	35.5	3365	37.2	5.5	364	4040	1290	7.23	673	8.25	127.79	0.61
2002_P_Till_3	MZTRF	2002	8	3	Canolat-Flax-Dur	0-25-0	ZT	3520.8	14.4	41	31.8	35.2	3175	37.9	5.12	394	4240	1260	7.43	372	10.25	143.96	0.77
2002_P_Till_3	MZTRF	2002	11	3	Canolat-Flax-Dur	50-0-25	ZT	3341.2	14.1	49	32.2	37.5	3555	43.1	5.27	367	4360	1350	7.49	450	12	146.05	0.75
2002_P_Till_3	MZTRF	2002	2	3	Wheat-Flax-Dur	0-25-0	ZT	2949.2	14.2	34	34.8	34.6	2910	38.7	5.51	394	4180	1200	7.58	301	6.5	127.29	0.55
2002_P_Till_3	MZTRF	2002	5	3	Wheat-Flax-Dur	50-0-25	ZT	3708.2	13.8	48	30	35.7	3420	40.1	5.28	368	4185	1270	7.57	362	8.75	126.34	0.66
2002_P_Till_3	MZTRF	2002	7	3	Canolat-Flax-Dur	0-0-25	ZT	3125.8	14.2	40	34.6	37.3	3260	41	5.24	409	4005	1290	7.67	336	8.75	97.66	0.54
2002_P_Till_3	MZTRF	2002	3	3	Wheat-Flax-Dur	25-0-25	ZT	3159.6	14	37	30.7	33.1	2820	37.5	5.15	268	3860	1210	7.73	340	7.25	127.13	0.63
2002_P_Till_3	MZTRF	2002	1	3	Wheat-Flax-Dur	0-0-25	ZT	3113.4	14.3	45	32.2	34	3100	36.9	5.08	403	3930	1170	7.22	338	7.75	131.33	0.52
2002_P_Till_3	MZTRF	2002	10	3	Canolat-Flax-Dur	25-25-0	ZT	3631.4	14.2	49	32.1	38.8	3275	42.5	5.81	394	4070	1280	7.38	375	9.5	128.36	0.69
2002_P_Till_3	MZTRF	2002	12	3	Canolat-Flax-Dur	50-25-0	ZT	3635.4	14.1	49	31.2	37.4	3900	44.9	5.66	368	4010	1245	7.53	356	9.5	124.41	0.57
2002_P_Till_3	MZTRF	2002	4	3	Wheat-Flax-Dur	25-25-0	ZT	3281.6	14.1	39	31.3	36.5	3265	34.9	5.28	389	4070	1240	7.62	336	9.5	122.6	0.6
2002_P_Till_3	MZTRF	2002	12	3	Canolat-Flax-Dur	50-25-0	CT	3143.2	14.8	65	33.9	40.1	3765	35.6	5.53	412	4650	1330	7.59	392	12.5	148.22	0.78
2002_P_Till_3	MZTRF	2002	10	3	Canolat-Flax-Dur	25-25-0	CT	3025.6	14.8	63	34.5	38.2	3508	31.3	5.43	409	4290	1260	7.57	450	11.75	136.94	0.86
2002_P_Till_3	MZTRF	2002	7	3	Canolat-Flax-Dur	0-0-25	CT	3183.2	15	82	36.6	41	3980	31.4	5.27	431	4590	1380	7.55	401	9.75	137.6	0.95
2002_P_Till_3	MZTRF	2002	11	3	Canolat-Flax-Dur	50-0-25	CT	3111.4	14.9	95	35.8	40.1	4025	27.6	5.22	433	4655	1410	7.46	536	10.25	135.16	1.05
2002_P_Till_3	MZTRF	2002	6	3	Wheat-Flax-Dur	50-25-0	CT	3377.8	15	80	41.2	41.7	3445	27.3	5.49	432	5070	1460	7.51	357	10.75	145.37	1.09
2002_P_Till_3	MZTRF	2002	1	3	Wheat-Flax-Dur	0-0-25	CT	2602.8	14.8	119	39.3	41.3	3635	20.7	5.83	436	4970	1500	7.52	299	11.5	159.68	1.25
2002_P_Till_3	MZTRF	2002	3	3	Wheat-Flax-Dur	25-0-25	CT	3210	14.8	170	39.6	38.5	3300	15	4.89	437	4390	1440	7.1	301	13.5	150.45	1.33
2002_P_Till_3	MZTRF	2002	8	3	Canolat-Flax-Dur	0-25-0	CT	2498	14.8	147	46.3	42.5	3455	19.2	5.55	394	5100	1580	7.18	344	21.75	137.5	1.54
2002_P_Till_3	MZTRF	2002	4	3	Wheat-Flax-Dur	25-25-0	CT	3154.2	14.7	116	44	39.3	3020	17.9	5.63	428	4780	1520	7.33	270	12	146.49	1.79
2002_P_Till_3	MZTRF	2002	2	3	Wheat-Flax-Dur	0-25-0	CT	2916.4	14.8	87	44.6	42.1	3760	20.7	5.73	423	4695	1600	7.28	339	11	145.61	1.4
2002_P_Till_3	MZTRF	2002	5	3	Wheat-Flax-Dur	50-0-25	CT	3412.2	14.9	106	42.6	40.3	2900	23.1	5.02	423	4510	1550	7.19	395	10.75	137.71	1.22
2002_P_Till_3	MZTRF	2002	9	3	Canolat-Flax-Dur	25-0-25	CT	3310.2	14.9	98	45	43.6	3490	25.8	5.4	420	4670	1610	7.27	376	11.75	162.55	1.42
2002_P_Till_3	MZTRF	2002	5	4	Wheat-Flax-Dur	50-0-25	CT	3183.2	14.7	55	36.4	38.5	3240	33.2	5.2	430	4170	1320	7.39	874	10.5	132.44	0.97
2002_P_Till_3	MZTRF	2002	2	4	Wheat-Flax-Dur	0-25-0	CT	2739.8	14.9	39	37.1	36.7	3090	33.8	5.65	431	4245	1260	7.54	516	9.75	95.2	0.76
2002_P_Till_3	MZTRF	2002	12	4	Canolat-Flax-Dur	50-25-0	CT	2868	14.9	51	35.2	39.3	3300	37.9	5.67	419	4460	1360	7.67	452	10	126.61	0.65
2002_P_Till_3	MZTRF	2002	8	4	Canolat-Flax-Dur	0-25-0	CT	2298	14.7	62	31.7	35.9	3047	31	5.34	422	4320	1270	7.64	470	11	162.31	0.79
2002_P_Till_3	MZTRF	2002	11	4	Canolat-Flax-Dur	50-0-25	CT	3076	14.6	75	27.6	36.8	3275	33.8	5.5	384	4250	1370	7.03	377	10	136.4	0.69
2002_P_Till_3	MZTRF	2002	10	4	Canolat-Flax-Dur	25-25-0	CT	2236.8	14.5	49	27.5	36.2	3080	32.1	5.74	420	4220	1260	7.24	418	10.5	128.12	0.68
2002_P_Till_3	MZTRF	2002	7	4	Canolat-Flax-Dur	0-0-25	CT	2913.8	14.5	63	29.1	39	3200	35.4	6.7	424	4360	1360	7.5	364	7.75	110.61	0.74
2002_P_Till_3	MZTRF	2002	1	4	Wheat-Flax-Dur	0-0-25	CT	3129.4	14.5	57	30.1	44.6	3270	32.8	6.19	367	4150	1240	7.45	432	8.5	141.2	0.7
2002_P_Till_3	MZTRF	2002	3	4	Wheat-Flax-Dur	25-0-25	CT	3098.4	14.7	55	28.3	36.7	3400	33.1	6.09	378	4150	1410	7.67	353	7.5	105.46	0.47
2002_P_Till_3	MZTRF	2002	4	4	Wheat-Flax-Dur	25-25-0	CT	3081.8	14.6	51	30.6	38.5	3500	33.7	5.92	383	4420	1360	7.68	383	8.25	124.47	0.58
2002_P_Till_3	MZTRF	2002	9	4	Canolat-Flax-Dur	25-0-25	CT	3432.2	14.5	61	28.5	37.6	3970	34.8	5.87	347	4420	1400	7.69	397	10.75	119.99	0.81
2002_P_Till_3	MZTRF	2002	6	4	Wheat-Flax-Dur	50-25-0	CT	3694.8	14.2	48	27.8	34.7	3560	33	5.9	326	4220	1340	7.7	373	10	114.91	0.56
2002_P_Till_3	MZTRF	2002	12	4	Canolat-Flax-Dur	50-25-0	ZT	3790	14.2	54	32.6	36.8	3580	34.4	6.04	367	4170	1290	7.78	367	13.5	103.6	0.51
2002_P_Till_3	MZTRF	2002	7	4	Canolat-Flax-Dur	0-0-25	ZT	3510.8	14.3	48	32	38.7	3450	35.1	5.78	346	3990	1280	7.79	370	8.5	123.85	0.56
2002_P_Till_3	MZTRF	2002	8	4	Canolat-Flax-Dur	0-25-0	ZT	3413.4	14.3	46	33.5	40	3300	33.1	5.37	381	3750	1170	7.32	323	14	125.15	0.72
2002_P_Till_3	MZTRF	2002	4	4	Wheat-Flax-Dur	25-25-0	ZT	3328.6	14.2	36	35	38.8	3100	33.8	6.09	371	4130	1305	7.51	426	11.5	128.18	0.71
2002_P_Till_3	MZTRF	2002	10	4	Canolat-Flax-Dur	25-25-0	ZT	3576	14.1	42	34.8	40.8	3800	33.8	6.07	380	4040	1250	7.58	343	8.5	96.78	0.56
2002_P_Till_3	MZTRF	2002	6	4	Wheat-Flax-Dur	50-25-0	ZT	3963.4	13.9	50	34.5	41.5	3160	33.4	6.09	353	4490	1420	7.65	302	9.5	137.83	0.71
2002_P_Till_3	MZTRF	2002	2	4	Wheat-Flax-Dur	0-25-0	ZT	3579	14.2	49	36	40.3	2632	26.7	6.07	379	4510	1610	7.68	249	7	110.48	0.67
2002_P_Till_3	MZTRF	2002	1	4	Wheat-Flax-Dur	0-0-25	ZT	3689.8	13.8	58	32.7	37.2	4040	24.6	5.56	331	4169	1410	7.65	260	7.75	110.46	0.85
2002_P_Till_3	MZTRF	2002	3	4	Wheat-Flax-Dur	25-0-25	ZT	4096.6	14.1	61	32.5	38.6	4600	27.7	5.77	354	4370	1480	7.55	284	12.5	117.89	0.9
2002_P_Till_3	MZTRF	2002	11	4	Canolat-Flax-Dur	50-0-25	ZT	3944.8	14.3	76	34.4	42.1	4365	30.7	6.1	361	4165	1500	7.52	353	13.25	119.5	0.81
2002_P_Till_3	MZTRF	2002	5	4	Wheat-Flax-Dur	50-0-25	ZT	3928.8	14.4	70	36	42.8	4315	30.1	5.79	398	4652	1490	7.21	296	11.25	136.49	0.94
2002_P_Till_3	MZTRF	2002	9	4	Canolat-Flax-Dur	25-0-25	ZT	3818	14.6	78	36.5	45.4	4230	33	5.85	396	4420	1350	7.14	440	9.25	159.35	0.89
2003_P_Till_3	BRC-North	2003	5	1	Wheat-Flax-Dur	50-0-25	CT	2480.2	15.3	74	27.4	51.9	2900	29.2	5.79	379	3885	1340	.	.	10	141.98	.
2003_P_Till_3	BRC-North	2003	7	1	Canolat-Flax-Dur	0-0-25	CT	2861.6	15	86	22.3	47	2700	27.6	5.28	235	3602	1280	.	.	12.25	121.58	.
2003_P_Till_3	BRC-North	2003	6	1	Wheat-Flax-Dur	50-25-0	CT	2707.6	14.3	94	20.4	47.7	2790	22.6	5.47	210	3750	1340	.	.	12.25	103.92	.
2003_P_Till_3	BRC-North	2003	3	1	Wheat-Flax-Dur	25-0-25	CT	2667	14.4	114	15.8	44.2	2440	21.2	5.16	176	3390	1285	.	.	13.5	114.09	.
2003_P_Till_3	BRC-North	2003	10	1	Canolat-Flax-Dur	25-25-0	CT	2567	14.3	104	20.5	47.6	2925	28.5	5.87	208	3850	1440	.	.	10.5	98.9	.
2003_P_Till_3	BRC-North	2003	9	1	Canolat-Flax-Dur	25-0-25	CT	2353	15.1	106	19	42.1	3450	26.5	5.17	161	3620	1380	.	.	10.25	95.77	.
2003_P_Till_3	BRC-North	2003	12	1	Canolat-Flax-Dur	50-25-0	CT	2266.6	15.1	102	19.8	42.8	2940	28.8	5.68	171	3650	1420	.	.	29	105.25	.
2003_P_Till_3	BRC-North	2003	1	1	Wheat-Flax-Dur	0-0-25	CT	1957.4	15.4	103	21.5	42.4	2850	29.5	5.81	182	3900	1380	.	.	12	90.96	.
2003_P_Till_3	BRC-North	2003	2	1	Wheat-Flax-Dur	0-25-0	CT	1833.4	15.5	86	22.8	42.2	2900	30.3	6.01	178	3990	1310	.	.	10	85.12	.
2003_P_Till_3	BRC-North	2003	4	1	Wheat-Flax-Dur	25-25-0	CT	1999.2	15.4	100	21.2	42	2985	29.5	5.85	167	3770	1410	.	.	12.75	107.31	.
2003_P_Till_3	BRC-North	2003	11	1	Canolat-Flax-Dur	50-0-25	CT	1931.4	15.7	119	21.4	43	3150	31.9	5.88	174	4057	1430	.	.	9	84.14	.
2003_P_Till_3	BRC-North	2003	8	1	Canolat-Flax-Dur	0-25-0	CT	2153.4	15.4	129	20.4	42.7	2950	30	5.45	162	3890	1410	.	.	16.5	118.74	.
2003_P_Till_3	BRC-North	2003	2	1	Wheat-Flax-Dur	0-25-0	ZT	2363.4	14.3	102	27.7	43.2	2800	24.6	6	192	3960	1420	.	.	11	170.4	.
2003_P_Till_3	BRC-North	2003	10	1	Canolat-Flax-Dur	25-25-0	ZT	3024.6	13.9	119	23	39.6	2600	23.6	5.46	177	3620	1390	.	.	9	153.4	.
2003_P_Till_3	BRC-North	2003	3	1	Wheat-Flax-Dur	25-0-25	ZT	3111.8	14	107	25.9	41.7	2600	24.3	5.95	169	3640	1340	.	.	7.5	142.65	.
2003_P_Till_3	BRC-North	2003	11	1	Canolat-Flax-Dur	50-0-25	ZT	3718.6	13.9	145	22.5	35.9	2700	25.5	5.31	210	3530	1140	.	.	9.5	154.15	.
2003_P_Till_3	BRC-North	2003	4	1	Wheat-Flax-Dur	25-25-0	ZT	2866.4	14.1	109	28.9	35	2550	25.4	5.74	196	3620	1190	.	.	8.5	150.83	.
2003_P_Till_3	BRC-North	2003	12	1	Canolat-Flax-Dur	50-25-0	ZT	3296.8	14	146	25.7	37.4	2655	29	5.57	211	3570	1270	.	.	14.75	163.3	.
2003_P_Till_3	BRC-North	2003	8	1	Canolat-Flax-Dur	0-25-0	ZT	3554.6	14.3	119	31	45.6	3120	34.5	7	233	4080	1430	.	.	15	156.15	.
2003_P_Till_3	BRC-North	2003	7	1	Canolat-Flax-Dur	0-0-25	ZT	4605.4	14.1	159	30.5	44.1	3300	29.2	6.05	306	3930	1460	.	.	15.5	170.15	.
2003_P_Till_3	BRC-North	2003	1	1	Wheat-Flax-Dur	0-0-25	ZT	4379	12.5	175	32	44.6	4000	29.2	4.74	284	3990	1480	.	.	12.75	162.28	.
2003_P_Till_3	BRC-North	2003	5	1	Wheat-Flax-Dur	50-0-25	ZT	4314	13.1	236	32.1	44.7	3800	25.7	4.25	340	3980	1465	.	.	21.5	200.9	.
2003_P_Till_3	BRC-North	2003	6	1	Wheat-Flax-Dur	50-25-0	ZT	3820.4	13.8	258	40.5	43.8	3620	24.7	5.22	299	3570	1410	.	.	20	195.66	.
2003_P_Till_3	BRC-North	2003	9	1	Canolat-Flax-Dur	25-0-25	ZT	3675.8	14.4	212	35.6	40.3	3050	24	4.88	273	3690	1400	.	.	17.75	186.37	.
2003_P_Till_3	BRC-North	2003	7	2	Canolat-Flax-Dur	0-0-25	ZT	1976.8	15.8	86	20.3	40.5	2900	34.5	5.51	196	3660	1370	.	.	12.5	91.62	.
2003_P_Till_3	BRC-North	2003	9	2	Canolat-Flax-Dur	25-0-25	ZT	2270.4	15.2	93	18.7	41	2920	33.9	5.27	174	3750	1495	.	.	15	100.31	.
2003_P_Till_3	BRC-North	2003	5	2	Wheat-Flax-Dur	50-0-25	ZT	2339.4	14.9	97	18	40.3	2990	32.9	5.56	180	3765	1515	.	.	11	113.11	.
2003_P_Till_3	BRC-North	2003	6	2	Wheat-Flax-Dur	50-25-0	ZT	2559.4	14.2	92	15.9	32.7	2445	24.6	5.02	154	3330	1320	.	.	24	119.75	.
2003_P_Till_3	BRC-North	2003	3	2	Wheat-Flax-Dur	25-0-25	ZT	2422.4	14.8	130	19.2	40.2	3070	30.8	5.49	189	4000	1510	.	.	11.25	126.83	.
2003_P_Till_3	BRC-North	2003	12	2	Canolat-Flax-Dur	50-25-0	ZT	2640.4	14.7	127	18.3	35.6	2805	27.7	5.3	188	3830	1440	.	.	12	114.95	.
2003_P_Till_3	BRC-North	2003	11	2	Canolat-Flax-Dur	50-0-25	ZT	2723	14.9	154	18.9	36.9	3000	28.1	5.04	177	3880	1475	.	.	14	138.3	.
2003_P_Till_3	BRC-North	2003	1	2	Wheat-Flax-Dur	0-0-25	ZT	2727.8	14.6	120	22.2	36.2	3000	27.3	5.98	183	3530	1370	.	.	11	135.17	.
2003_P_Till_3	BRC-North	2003	2	2	Wheat-Flax-Dur	0-25-0	ZT	2584	14.4	83	25.6	36	2725	26.5	5.63	175	3680	1340	.	.	12.25	146.22	.
2003_P_Till_3	BRC-North	2003	4	2	Wheat-Flax-Dur	25-25-0	ZT	2802.4	14.3	89	24.9	38.1	2890	27.9	6.44	185	3870	1420	.	.	18.5	141.15	.
2003_P_Till_3	BRC-North	2003	8	2	Canolat-Flax-Dur	0-25-0	ZT	2534	14.9	95	26.3	39.5	3050	31.7	6.12	203	3950	1460	.	.	19	126.44	.
2003_P_Till_3	BRC-North	2003	10	2	Canolat-Flax-Dur	25-25-0	ZT	2906.6	14.8	130	23	39.2	2930	30.1	5.28	202	3280	1260	.	.	14.5	151.46	.
2003_P_Till_3	BRC-North	2003	9	2	Canolat-Flax-Dur	25-0-25	CT	2677	14.7	151	17.1	35	2640	26.4	4.95	161	3250	1300	.	.	11.5	147.89	.
2003_P_Till_3	BRC-North	2003	3	2	Wheat-Flax-Dur	25-0-25	CT	2654.2	14.7	150	19	39.6	2750	31.7	5.8	194	3750	1430	.	.	10	144.99	.
2003_P_Till_3	BRC-North	2003	7	2	Canolat-Flax-Dur	0-0-25	CT	2270.6	15.4	153	21.3	43.1	3380	36.9	6.07	195	3950	1430	.	.	10	126.51	.
2003_P_Till_3	BRC-North	2003	5	2	Wheat-Flax-Dur	50-0-25	CT	2416.4	15.7	184	20.4	41.9	3465	35.4	5.77	180	3820	1440	.	.	12	142.67	.
2003_P_Till_3	BRC-North	2003	8	2	Canolat-Flax-Dur	0-25-0	CT	2330.4	15.4	159	22.1	44.5	3260	33.5	5.9	184	3795	1400	.	.	11	126.03	.
2003_P_Till_3	BRC-North	2003	11	2	Canolat-Flax-Dur	50-0-25	CT	2836	14.8	211	21	41.4	3165	33.5	5.51	185	3740	1430	.	.	8.5	146.72	.
2003_P_Till_3	BRC-North	2003	6	2	Wheat-Flax-Dur	50-25-0	CT	3146.2	14.4	182	23.3	41.1	3050	26.6	5.58	187	3620	1360	.	.	12	171.45	.
2003_P_Till_3	BRC-North	2003	4	2	Wheat-Flax-Dur	25-25-0	CT	3367.2	14.5	184	28.5	48.6	3540	28.8	5.87	223	3980	1530	.	.	15.5	160.58	.
2003_P_Till_3	BRC-North	2003	2	2	Wheat-Flax-Dur	0-25-0	CT	3325	14.6	195	33.6	49.4	4185	25.2	5.46	274	3965	1350	.	.	19.5	171.38	.
2003_P_Till_3	BRC-North	2003	12	2	Canolat-Flax-Dur	50-25-0	CT	3748	14.1	212	31.6	43.6	2890	23.3	4.35	260	3615	1470	.	.	25.5	174.39	.
2003_P_Till_3	BRC-North	2003	10	2	Canolat-Flax-Dur	25-25-0	CT	3460.2	13.8	221	37.6	49.3	3930	27.9	5.05	260	4000	1470	.	.	20.5	176.37	.
2003_P_Till_3	BRC-North	2003	1	2	Wheat-Flax-Dur	0-0-25	CT	3513.4	14.3	215	35.7	48.7	3600	26.6	5.64	256	3900	1415	.	.	14.5	188.02	.
2003_P_Till_3	BRC-North	2003	6	3	Wheat-Flax-Dur	50-25-0	ZT	2056.2	14.6	67	19.8	38.9	2700	29.8	5.77	195	3475	1320	.	.	23	82.39	.
2003_P_Till_3	BRC-North	2003	9	3	Canolat-Flax-Dur	25-0-25	ZT	2352.4	14.5	83	19.3	36.5	2710	31.4	5.4	215	3515	1310	.	.	14.5	122.55	.
2003_P_Till_3	BRC-North	2003	8	3	Canolat-Flax-Dur	0-25-0	ZT	2227.8	14.7	80	22.1	38.7	2930	30.9	5.69	205	3780	1345	.	.	12	116.42	.
2003_P_Till_3	BRC-North	2003	11	3	Canolat-Flax-Dur	50-0-25	ZT	2648	14.1	114	18.1	40.3	2800	30.6	5.41	212	3915	1380	.	.	11.5	130.37	.
2003_P_Till_3	BRC-North	2003	2	3	Wheat-Flax-Dur	0-25-0	ZT	2161.6	14.8	82	23.2	40.3	2990	28.8	4.7	230	3820	1360	.	.	8.5	120.32	.
2003_P_Till_3	BRC-North	2003	5	3	Wheat-Flax-Dur	50-0-25	ZT	2754.4	14.4	136	19.3	40	3350	27.5	5.54	214	3815	1420	.	.	11.5	139.22	.
2003_P_Till_3	BRC-North	2003	7	3	Canolat-Flax-Dur	0-0-25	ZT	2614.2	14.5	118	22.6	40.9	3030	28.5	5.54	212	3780	1390	.	.	12	151.94	.
2003_P_Till_3	BRC-North	2003	3	3	Wheat-Flax-Dur	25-0-25	ZT	2587.4	14.9	125	23.9	42.7	3440	29.5	5.86	208	3930	1490	.	.	12	148.03	.
2003_P_Till_3	BRC-North	2003	1	3	Wheat-Flax-Dur	0-0-25	ZT	2791.4	14.4	116	25.7	41.2	2990	28.2	5.71	230	3760	1330	.	.	8.25	141.01	.
2003_P_Till_3	BRC-North	2003	10	3	Canolat-Flax-Dur	25-25-0	ZT	2922.6	14.7	124	26.9	39.7	3420	26.1	5.55	196	3885	1430	.	.	8.5	151.39	.
2003_P_Till_3	BRC-North	2003	12	3	Canolat-Flax-Dur	50-25-0	ZT	2950.8	14.5	105	28.1	41.7	3165	28	5.89	197	3925	1420	.	.	11	147.02	.
2003_P_Till_3	BRC-North	2003	4	3	Wheat-Flax-Dur	25-25-0	ZT	2834.4	14.3	85	30	39.9	2900	27.3	5.93	198	3840	1380	.	.	7.5	147.34	.
2003_P_Till_3	BRC-North	2003	12	3	Canolat-Flax-Dur	50-25-0	CT	3009.6	14.8	122	28.4	41.5	3240	27.4	5.46	180	3860	1450	.	.	13	154.32	.
2003_P_Till_3	BRC-North	2003	10	3	Canolat-Flax-Dur	25-25-0	CT	2745	15.3	134	27.3	39.4	3440	28.2	5.56	182	3700	1365	.	.	12.5	149.3	.
2003_P_Till_3	BRC-North	2003	7	3	Canolat-Flax-Dur	0-0-25	CT	2972.2	14.6	159	25.1	40.1	4125	27.1	5.82	180	3590	1360	.	.	8.5	140.13	.
2003_P_Till_3	BRC-North	2003	11	3	Canolat-Flax-Dur	50-0-25	CT	3141.2	14.8	183	20.4	40.2	3150	28.2	4.83	168	3600	1390	.	.	10	156.58	.
2003_P_Till_3	BRC-North	2003	6	3	Wheat-Flax-Dur	50-25-0	CT	2644.8	14.6	141	23	39.2	2990	27.3	5.4	165	3605	1345	.	.	11	160.84	.
2003_P_Till_3	BRC-North	2003	1	3	Wheat-Flax-Dur	0-0-25	CT	3224.2	14.6	156	23.4	41.6	3070	27.9	5.35	202	3360	1255	.	.	9	152.23	.
2003_P_Till_3	BRC-North	2003	3	3	Wheat-Flax-Dur	25-0-25	CT	3330	14	158	25.1	44.6	3200	27.3	5.72	268	3925	1345	.	.	9	152.73	.
2003_P_Till_3	BRC-North	2003	8	3	Canolat-Flax-Dur	0-25-0	CT	3476	14.5	151	32.6	50.4	3670	31.6	5.63	302	4160	1550	.	.	15.5	156.52	.
2003_P_Till_3	BRC-North	2003	4	3	Wheat-Flax-Dur	25-25-0	CT	3566.4	14	164	31.4	47.3	3470	22.5	5.12	293	4040	1320	.	.	17	155.3	.
2003_P_Till_3	BRC-North	2003	2	3	Wheat-Flax-Dur	0-25-0	CT	3442.4	14.2	153	30.6	46.5	3420	26.8	5.31	288	4145	1310	.	.	21	158.74	.
2003_P_Till_3	BRC-North	2003	5	3	Wheat-Flax-Dur	50-0-25	CT	3591.4	13.6	187	31	48.6	3890	26.3	5.26	270	3965	1310	.	.	20.75	162.26	.
2003_P_Till_3	BRC-North	2003	9	3	Canolat-Flax-Dur	25-0-25	CT	3585	14.1	147	28.3	43.6	3430	28	4.97	250	3740	1320	.	.	19	164.76	.
2003_P_Till_3	BRC-North	2003	5	4	Wheat-Flax-Dur	50-0-25	CT	2556.2	14.5	132	16.7	39.3	2810	26.4	5.21	225	3450	1170	.	.	12	126.1	.
2003_P_Till_3	BRC-North	2003	2	4	Wheat-Flax-Dur	0-25-0	CT	2347.8	14.9	125	21.2	39.9	3275	31.9	5.9	240	3955	1300	.	.	12	132.9	.
2003_P_Till_3	BRC-North	2003	12	4	Canolat-Flax-Dur	50-25-0	CT	2321.6	15.8	132	19.1	38.2	3210	28.2	5.65	220	3835	1320	.	.	10.5	95.96	.
2003_P_Till_3	BRC-North	2003	8	4	Canolat-Flax-Dur	0-25-0	CT	2323	15.5	146	20.9	41.8	3520	29.4	5.92	245	4040	1365	.	.	12	113.14	.
2003_P_Till_3	BRC-North	2003	11	4	Canolat-Flax-Dur	50-0-25	CT	2097.8	15.9	124	18.8	36.6	3000	24.8	5.32	227	3630	1250	.	.	10	84.14	.
2003_P_Till_3	BRC-North	2003	10	4	Canolat-Flax-Dur	25-25-0	CT	2001.4	15.9	151	18.7	37.9	3270	28.7	5.88	219	3815	1350	.	.	13	95.97	.
2003_P_Till_3	BRC-North	2003	7	4	Canolat-Flax-Dur	0-0-25	CT	1911.4	15.6	133	20.7	40.3	3280	29.2	5.87	233	4005	1350	.	.	12	99.94	.
2003_P_Till_3	BRC-North	2003	1	4	Wheat-Flax-Dur	0-0-25	CT	2058.8	15.3	124	19.7	36.8	2940	26.5	5.74	243	3880	1325	.	.	11	110.69	.
2003_P_Till_3	BRC-North	2003	3	4	Wheat-Flax-Dur	25-0-25	CT	2082	15.5	130	20.7	41.4	3410	29.2	5.73	245	3915	1325	.	.	10	83.47	.
2003_P_Till_3	BRC-North	2003	4	4	Wheat-Flax-Dur	25-25-0	CT	2467.2	15.9	142	23.7	40.8	3230	31.5	5.58	240	4015	1350	.	.	16.5	84.08	.
2003_P_Till_3	BRC-North	2003	9	4	Canolat-Flax-Dur	25-0-25	CT	2452.4	15.9	150	22.6	41.2	2800	32.1	5.45	232	3975	1350	.	.	15	146.96	.
2003_P_Till_3	BRC-North	2003	6	4	Wheat-Flax-Dur	50-25-0	CT	2559	15.5	143	23.6	43	3015	32.4	5.42	230	4050	1400	.	.	18	148.02	.
2003_P_Till_3	BRC-North	2003	12	4	Canolat-Flax-Dur	50-25-0	ZT	3295.4	13.8	96	25.7	37.5	2205	24.1	5.5	222	3735	1285	.	.	10	146.85	.
2003_P_Till_3	BRC-North	2003	7	4	Canolat-Flax-Dur	0-0-25	ZT	3371.4	14.2	109	24	36.5	2235	25.7	5.65	240	3575	1275	.	.	9.5	135.02	.
2003_P_Till_3	BRC-North	2003	8	4	Canolat-Flax-Dur	0-25-0	ZT	2913.2	14.2	75	27.7	40.9	2105	27	5.35	240	3735	1190	.	.	11	160.35	.
2003_P_Till_3	BRC-North	2003	4	4	Wheat-Flax-Dur	25-25-0	ZT	3450.6	14	73	30.8	40.2	2000	26	5.81	243	3815	1250	.	.	10	152.19	.
2003_P_Till_3	BRC-North	2003	10	4	Canolat-Flax-Dur	25-25-0	ZT	3422	14.1	87	30.9	40	2000	27	5.62	252	3700	1240	.	.	10	172.12	.
2003_P_Till_3	BRC-North	2003	6	4	Wheat-Flax-Dur	50-25-0	ZT	3547.2	14.2	112	32.9	43.4	2300	27.3	5.84	260	3860	1380	.	.	15.5	183.21	.
2003_P_Till_3	BRC-North	2003	2	4	Wheat-Flax-Dur	0-25-0	ZT	3267.2	14.1	79	36.6	44.2	2340	26.5	6.65	280	3840	1320	.	.	10.5	219.69	.
2003_P_Till_3	BRC-North	2003	1	4	Wheat-Flax-Dur	0-0-25	ZT	3594.4	14.3	103	31.8	40.6	2405	24.7	5.86	260	3750	1320	.	.	11.25	192.62	.
2003_P_Till_3	BRC-North	2003	3	4	Wheat-Flax-Dur	25-0-25	ZT	3838.6	13.3	128	36	45.2	2380	27.1	5.96	305	4040	1320	.	.	14.75	192.19	.
2003_P_Till_3	BRC-North	2003	11	4	Canolat-Flax-Dur	50-0-25	ZT	4014.6	14.2	159	35.1	46	2620	25.9	5.87	324	4150	1410	.	.	19	178.61	.
2003_P_Till_3	BRC-North	2003	5	4	Wheat-Flax-Dur	50-0-25	ZT	3454.8	14	151	33.4	45.8	3265	24	5.39	296	4175	1415	.	.	15	165.27	.
2003_P_Till_3	BRC-North	2003	9	4	Canolat-Flax-Dur	25-0-25	ZT	3708.4	14.6	158	33.7	44.3	2730	25.1	5.46	277	3985	1330	.	.	17.5	185.56	.
2003_P_Till_3	MZTRF	2003	5	1	Wheat-Flax-Dur	50-0-25	CT	2830.8	14.7	75	22.4	39.7	2140	28.3	4.9	305	3810	1165	.	.	12	114.78	.
2003_P_Till_3	MZTRF	2003	7	1	Canolat-Flax-Dur	0-0-25	CT	2579.8	14.8	92	21.6	42.3	2175	30.6	5.36	323	4015	1195	.	.	10.5	108.34	.
2003_P_Till_3	MZTRF	2003	6	1	Wheat-Flax-Dur	50-25-0	CT	2664.8	15.1	65	23.5	40.2	2170	30.2	5.66	326	3805	1195	.	.	18	114.53	.
2003_P_Till_3	MZTRF	2003	3	1	Wheat-Flax-Dur	25-0-25	CT	2491.2	15.1	71	23.3	40.6	2110	31.2	5.87	308	3890	1200	.	.	12	102.72	.
2003_P_Till_3	MZTRF	2003	10	1	Canolat-Flax-Dur	25-25-0	CT	2589.4	14.6	58	25.1	40.3	2280	35	5.92	296	4040	1270	.	.	11.75	85.41	.
2003_P_Till_3	MZTRF	2003	9	1	Canolat-Flax-Dur	25-0-25	CT	2560	15.2	73	19.8	39.9	2275	28.4	4.94	298	3770	1160	.	.	14	124.5	.
2003_P_Till_3	MZTRF	2003	12	1	Canolat-Flax-Dur	50-25-0	CT	2543.2	14.9	64	22.5	39.2	2130	31.1	5.27	302	3750	1180	.	.	16	116.93	.
2003_P_Till_3	MZTRF	2003	1	1	Wheat-Flax-Dur	0-0-25	CT	2554.6	14.7	71	22.7	43.3	2445	33.2	5.39	302	3930	1240	.	.	13	107.66	.
2003_P_Till_3	MZTRF	2003	2	1	Wheat-Flax-Dur	0-25-0	CT	2715.4	14.5	47	21.8	37.3	2265	29.3	5.43	282	3655	1135	.	.	13.5	115.32	.
2003_P_Till_3	MZTRF	2003	4	1	Wheat-Flax-Dur	25-25-0	CT	2571.2	14.5	63	22	41	2800	32.4	5.69	306	4055	1250	.	.	14.5	87.56	.
2003_P_Till_3	MZTRF	2003	11	1	Canolat-Flax-Dur	50-0-25	CT	2506.2	15.5	74	20.8	44.1	2405	32.3	5.56	304	3900	1270	.	.	15.5	122.34	.
2003_P_Till_3	MZTRF	2003	8	1	Canolat-Flax-Dur	0-25-0	CT	2701.8	15.1	66	23.8	43.3	2775	36.4	5.34	299	4025	1270	.	.	13.75	89.47	.
2003_P_Till_3	MZTRF	2003	2	1	Wheat-Flax-Dur	0-25-0	ZT	2413.2	15.3	52	27.1	43.6	2410	37.2	5.65	324	3935	1220	.	.	11.25	126.49	.
2003_P_Till_3	MZTRF	2003	10	1	Canolat-Flax-Dur	25-25-0	ZT	2534.2	15.1	62	22.7	43.5	2425	37.8	5.64	318	4025	1250	.	.	14	132.22	.
2003_P_Till_3	MZTRF	2003	3	1	Wheat-Flax-Dur	25-0-25	ZT	2784.6	14.7	51	20.2	39.4	2275	35.6	5.7	293	3880	1220	.	.	11.5	101.64	.
2003_P_Till_3	MZTRF	2003	11	1	Canolat-Flax-Dur	50-0-25	ZT	2836.2	14.5	63	17.2	42.1	2515	37.8	5.37	296	4150	1260	.	.	9	103.26	.
2003_P_Till_3	MZTRF	2003	4	1	Wheat-Flax-Dur	25-25-0	ZT	2696.4	15.2	53	21.2	41.8	2390	37.9	5.25	281	3860	1230	.	.	10.5	119.63	.
2003_P_Till_3	MZTRF	2003	12	1	Canolat-Flax-Dur	50-25-0	ZT	2775.4	15	89	17.9	41.4	2755	36.5	5.34	290	3820	1175	.	.	13	120.25	.
2003_P_Till_3	MZTRF	2003	8	1	Canolat-Flax-Dur	0-25-0	ZT	2822	14.6	108	17.1	41.7	2495	30.2	4.96	287	3730	1120	.	.	15.75	148.17	.
2003_P_Till_3	MZTRF	2003	7	1	Canolat-Flax-Dur	0-0-25	ZT	3040.4	14.9	115	18.9	43.4	2260	38.1	4.76	320	3875	1170	.	.	11.5	110.76	.
2003_P_Till_3	MZTRF	2003	1	1	Wheat-Flax-Dur	0-0-25	ZT	2764.8	14.8	92	20.2	44.1	2280	39.3	4.9	318	3970	1190	.	.	13	122.25	.
2003_P_Till_3	MZTRF	2003	5	1	Wheat-Flax-Dur	50-0-25	ZT	2749.2	15.2	89	20.1	44	2465	41	5.07	397	3925	1285	.	.	12.5	120.51	.
2003_P_Till_3	MZTRF	2003	6	1	Wheat-Flax-Dur	50-25-0	ZT	2742.8	15.5	72	20.3	45.1	2550	41.4	4.96	297	4100	1320	.	.	21	122.79	.
2003_P_Till_3	MZTRF	2003	9	1	Canolat-Flax-Dur	25-0-25	ZT	2865.2	14.9	72	17.2	41.1	2285	36.4	5.11	257	3600	1310	.	.	12.5	139.67	.
2003_P_Till_3	MZTRF	2003	7	2	Canolat-Flax-Dur	0-0-25	ZT	3185.4	14.8	94	29	47.3	2475	36.9	5.83	305	4080	1460	.	.	10	115.6	.
2003_P_Till_3	MZTRF	2003	9	2	Canolat-Flax-Dur	25-0-25	ZT	2974.4	15.1	97	23.3	38	2450	29.7	5.32	310	3660	1280	.	.	9	135.51	.
2003_P_Till_3	MZTRF	2003	5	2	Wheat-Flax-Dur	50-0-25	ZT	3007	14.4	93	22.1	43.6	2495	32.8	5.96	309	3770	1345	.	.	11	131.72	.
2003_P_Till_3	MZTRF	2003	6	2	Wheat-Flax-Dur	50-25-0	ZT	2800.2	14.6	80	24	38.4	2270	24.8	6.3	297	3690	1250	.	.	9	120.41	.
2003_P_Till_3	MZTRF	2003	3	2	Wheat-Flax-Dur	25-0-25	ZT	2795.4	14.2	81	21.1	34.8	2085	22.2	5.22	280	3385	1220	.	.	9.5	106.44	.
2003_P_Till_3	MZTRF	2003	12	2	Canolat-Flax-Dur	50-25-0	ZT	2647.2	14.8	85	20.8	35.7	2205	22.5	5.46	294	3465	1190	.	.	8.5	103.64	.
2003_P_Till_3	MZTRF	2003	11	2	Canolat-Flax-Dur	50-0-25	ZT	2883.8	14.6	92	18.7	35.9	2370	23.2	5.02	277	3320	1200	.	.	7.25	89.74	.
2003_P_Till_3	MZTRF	2003	1	2	Wheat-Flax-Dur	0-0-25	ZT	2853.8	14.8	69	24.7	38.1	2300	24.9	5.22	302	3500	1190	.	.	7.5	116.66	.
2003_P_Till_3	MZTRF	2003	2	2	Wheat-Flax-Dur	0-25-0	ZT	2821.8	14.9	64	26	39.7	2305	26.8	5.7	300	3530	1190	.	.	13.5	129.6	.
2003_P_Till_3	MZTRF	2003	4	2	Wheat-Flax-Dur	25-25-0	ZT	2813.8	15	77	23.3	38.6	2350	27.1	5.61	307	3520	1210	.	.	12	132.31	.
2003_P_Till_3	MZTRF	2003	8	2	Canolat-Flax-Dur	0-25-0	ZT	2220.6	15.1	85	23.6	39.2	2330	27.4	5.29	338	3620	1190	.	.	10.25	110.48	.
2003_P_Till_3	MZTRF	2003	10	2	Canolat-Flax-Dur	25-25-0	ZT	2513.2	14.9	82	21.6	40.8	2135	27.5	5.31	310	3530	1205	.	.	12.75	120.2	.
2003_P_Till_3	MZTRF	2003	9	2	Canolat-Flax-Dur	25-0-25	CT	2692.4	14.7	86	18.5	42.3	2420	30.4	4.57	286	3565	1260	.	.	10	103.54	.
2003_P_Till_3	MZTRF	2003	3	2	Wheat-Flax-Dur	25-0-25	CT	2483	15.5	111	17.1	41.9	2205	25.6	4.62	273	3430	1230	.	.	11	119.04	.
2003_P_Till_3	MZTRF	2003	7	2	Canolat-Flax-Dur	0-0-25	CT	2688.4	14.4	97	20.7	43.8	2070	30	4.3	304	3810	1305	.	.	13.5	131.26	.
2003_P_Till_3	MZTRF	2003	5	2	Wheat-Flax-Dur	50-0-25	CT	2622.2	14.7	106	17.7	41	2300	28.9	4.62	279	3530	1335	.	.	11	113.33	.
2003_P_Till_3	MZTRF	2003	8	2	Canolat-Flax-Dur	0-25-0	CT	2786.2	14.9	75	23.7	41.6	2400	29.3	5.3	296	3640	1300	.	.	11	113.33	.
2003_P_Till_3	MZTRF	2003	11	2	Canolat-Flax-Dur	50-0-25	CT	2843.2	14.8	112	20.2	41.6	2550	29.1	4.7	298	3505	1275	.	.	14	111.08	.
2003_P_Till_3	MZTRF	2003	6	2	Wheat-Flax-Dur	50-25-0	CT	3007.6	14.8	87	24.6	40.5	2460	29.5	6.06	298	3640	1360	.	.	13.5	130.05	.
2003_P_Till_3	MZTRF	2003	4	2	Wheat-Flax-Dur	25-25-0	CT	2989.8	15.2	82	26.6	42	2510	30.6	5.66	302	3740	1390	.	.	13.5	145.46	.
2003_P_Till_3	MZTRF	2003	2	2	Wheat-Flax-Dur	0-25-0	CT	3494.2	15.6	81	32.1	45	2535	35.4	5.68	291	3855	1400	.	.	12.25	146.91	.
2003_P_Till_3	MZTRF	2003	12	2	Canolat-Flax-Dur	50-25-0	CT	3337.6	15.7	105	28.5	46	3075	35.7	5.47	330	3860	1440	.	.	18.25	150.67	.
2003_P_Till_3	MZTRF	2003	10	2	Canolat-Flax-Dur	25-25-0	CT	3287.6	15.8	91	28.5	42.3	3000	33.6	5.88	295	3816	1440	.	.	15.25	125.68	.
2003_P_Till_3	MZTRF	2003	1	2	Wheat-Flax-Dur	0-0-25	CT	3051	15.7	92	28.1	41.5	2775	32.4	5.75	307	3790	1385	.	.	17	138.49	.
2003_P_Till_3	MZTRF	2003	6	3	Wheat-Flax-Dur	50-25-0	ZT	3260.2	14.9	70	25	39.5	2845	29.8	5.6	302	3645	1330	.	.	13.5	155.63	.
2003_P_Till_3	MZTRF	2003	9	3	Canolat-Flax-Dur	25-0-25	ZT	2943.2	14.9	92	25.1	37.9	2230	26.3	5.22	345	3640	1320	.	.	14.5	151.44	.
2003_P_Till_3	MZTRF	2003	8	3	Canolat-Flax-Dur	0-25-0	ZT	2689.2	15.2	95	24.6	38.5	3160	19.2	4.93	294	3565	1200	.	.	17.5	179.86	.
2003_P_Till_3	MZTRF	2003	11	3	Canolat-Flax-Dur	50-0-25	ZT	2785.8	15.2	143	22.6	42.5	3670	21.1	4.63	309	3665	1210	.	.	14	153.7	.
2003_P_Till_3	MZTRF	2003	2	3	Wheat-Flax-Dur	0-25-0	ZT	2872	14.9	133	24.7	45.5	3790	20.8	5.07	312	3770	1240	.	.	11	189.55	.
2003_P_Till_3	MZTRF	2003	5	3	Wheat-Flax-Dur	50-0-25	ZT	2734.2	15.1	181	21.8	47.3	3940	20.1	4.78	319	3665	1240	.	.	14.5	203.11	.
2003_P_Till_3	MZTRF	2003	7	3	Canolat-Flax-Dur	0-0-25	ZT	2733.2	14.9	113	23.2	45.9	3480	23.9	4.95	357	3810	1210	.	.	13	148.86	.
2003_P_Till_3	MZTRF	2003	3	3	Wheat-Flax-Dur	25-0-25	ZT	2973	15.3	72	24.5	45	3640	26.5	5.75	338	3810	1220	.	.	13.5	180.17	.
2003_P_Till_3	MZTRF	2003	1	3	Wheat-Flax-Dur	0-0-25	ZT	3082.2	14.8	58	25.3	46	3530	32.9	5.02	340	3790	1170	.	.	10.75	139.96	.
2003_P_Till_3	MZTRF	2003	10	3	Canolat-Flax-Dur	25-25-0	ZT	2817.4	15.1	79	24.9	46.6	3610	35.3	5.74	360	4080	1255	.	.	10.75	155.78	.
2003_P_Till_3	MZTRF	2003	12	3	Canolat-Flax-Dur	50-25-0	ZT	2679.6	15.7	105	22.1	42.8	3120	31.5	4.72	322	3600	1150	.	.	14.75	198.13	.
2003_P_Till_3	MZTRF	2003	4	3	Wheat-Flax-Dur	25-25-0	ZT	2910.8	15.2	93	28.5	52.2	3625	42.7	5.85	382	4200	1270	.	.	15.25	199.83	.
2003_P_Till_3	MZTRF	2003	12	3	Canolat-Flax-Dur	50-25-0	CT	2719.2	15.1	95	24.1	46.4	3725	40.1	6.01	321	3850	1190	.	.	15.75	175.24	.
2003_P_Till_3	MZTRF	2003	10	3	Canolat-Flax-Dur	25-25-0	CT	2786.4	15	73	24	43.5	3620	36	5.87	311	3805	1130	.	.	13.5	209.18	.
2003_P_Till_3	MZTRF	2003	7	3	Canolat-Flax-Dur	0-0-25	CT	3117.2	14.6	78	26	44	3720	34.3	6.47	296	3750	1195	.	.	12.5	173.06	.
2003_P_Till_3	MZTRF	2003	11	3	Canolat-Flax-Dur	50-0-25	CT	3178.6	15.1	83	26.3	45.1	4000	39	6.03	303	4180	1260	.	.	15	206.02	.
2003_P_Till_3	MZTRF	2003	6	3	Wheat-Flax-Dur	50-25-0	CT	3352.8	15.3	68	28.6	45.7	3715	35.2	6.3	290	3930	1250	.	.	18.75	203.41	.
2003_P_Till_3	MZTRF	2003	1	3	Wheat-Flax-Dur	0-0-25	CT	3270.8	15.4	93	27.6	41.7	3300	28.5	5.09	302	3550	1190	.	.	15	184.95	.
2003_P_Till_3	MZTRF	2003	3	3	Wheat-Flax-Dur	25-0-25	CT	3376.6	15.2	92	29.8	45.2	3370	26.7	5.19	306	3730	1210	.	.	16.75	186.73	.
2003_P_Till_3	MZTRF	2003	8	3	Canolat-Flax-Dur	0-25-0	CT	3404.2	15.7	90	31.9	45.6	3470	26.6	5.4	277	3730	1290	.	.	18	214.95	.
2003_P_Till_3	MZTRF	2003	4	3	Wheat-Flax-Dur	25-25-0	CT	3447.8	15.3	89	30	44.3	3460	24.4	5.6	259	3810	1260	.	.	16.25	228.41	.
2003_P_Till_3	MZTRF	2003	2	3	Wheat-Flax-Dur	0-25-0	CT	3476	15.4	111	34.6	47.5	3670	24.8	5.62	279	4040	1350	.	.	26.5	212.07	.
2003_P_Till_3	MZTRF	2003	5	3	Wheat-Flax-Dur	50-0-25	CT	3464.6	15.8	140	31.5	46.3	3510	22.4	5.08	248	3790	1350	.	.	19.5	221.21	.
2003_P_Till_3	MZTRF	2003	9	3	Canolat-Flax-Dur	25-0-25	CT	3252.6	15.7	173	32.3	47.9	3480	21.9	4.96	259	3815	1320	.	.	21	214.92	.
2003_P_Till_3	MZTRF	2003	5	4	Wheat-Flax-Dur	50-0-25	CT	3566.6	15	108	26.2	48.6	3730	38.4	5	307	3980	1250	.	.	9.5	117.76	.
2003_P_Till_3	MZTRF	2003	2	4	Wheat-Flax-Dur	0-25-0	CT	2984.8	15.9	84	29.3	47.5	3710	36.2	6.06	326	3990	1240	.	.	11	153.82	.
2003_P_Till_3	MZTRF	2003	12	4	Canolat-Flax-Dur	50-25-0	CT	3146.6	15.5	73	28.2	47.7	3515	35	6.29	309	3825	1300	.	.	11.25	152.26	.
2003_P_Till_3	MZTRF	2003	8	4	Canolat-Flax-Dur	0-25-0	CT	2813.2	15.6	78	27.2	46.1	3500	35.6	6.29	306	3880	1280	.	.	11.5	147.23	.
2003_P_Till_3	MZTRF	2003	11	4	Canolat-Flax-Dur	50-0-25	CT	2918.2	15.2	96	24	43.6	3590	33	5.04	329	3820	1280	.	.	13.5	185.43	.
2003_P_Till_3	MZTRF	2003	10	4	Canolat-Flax-Dur	25-25-0	CT	2740.4	15.5	65	25.9	45.6	3630	34.5	6.02	339	3880	1320	.	.	9	149.41	.
2003_P_Till_3	MZTRF	2003	7	4	Canolat-Flax-Dur	0-0-25	CT	2841.6	15.5	53	24.1	37.4	3200	29.1	4.9	269	3260	1150	.	.	8.75	139.32	.
2003_P_Till_3	MZTRF	2003	1	4	Wheat-Flax-Dur	0-0-25	CT	2573	15.8	54	27.6	42.4	3440	36.3	5.64	318	3745	1320	.	.	10	135.41	.
2003_P_Till_3	MZTRF	2003	3	4	Wheat-Flax-Dur	25-0-25	CT	2849.8	15.3	66	24.8	42.7	3360	36.2	5.13	298	3590	1230	.	.	9.5	144.55	.
2003_P_Till_3	MZTRF	2003	4	4	Wheat-Flax-Dur	25-25-0	CT	2673	16	74	24.8	44	3535	37.9	5.49	313	3850	1230	.	.	13	178.33	.
2003_P_Till_3	MZTRF	2003	9	4	Canolat-Flax-Dur	25-0-25	CT	2616.2	15.8	66	23.9	38.3	4000	31.1	4.74	313	3310	1130	.	.	11.5	157.66	.
2003_P_Till_3	MZTRF	2003	6	4	Wheat-Flax-Dur	50-25-0	CT	2619.4	15.6	62	23.5	42.4	3410	39.1	5.77	314	3890	1290	.	.	10	142.4	.
2003_P_Till_3	MZTRF	2003	12	4	Canolat-Flax-Dur	50-25-0	ZT	3045.6	15.4	90	26.6	41.1	3510	31.1	5.36	301	3690	1280	.	.	14.25	166.5	.
2003_P_Till_3	MZTRF	2003	7	4	Canolat-Flax-Dur	0-0-25	ZT	3000	15.7	85	29.5	41.5	3260	30.9	5.24	317	3535	1290	.	.	14.25	207.02	.
2003_P_Till_3	MZTRF	2003	8	4	Canolat-Flax-Dur	0-25-0	ZT	3098.2	15.4	100	33.9	45.5	3470	29.1	5.47	304	3930	1380	.	.	16	214.49	.
2003_P_Till_3	MZTRF	2003	4	4	Wheat-Flax-Dur	25-25-0	ZT	3176.4	16	130	35.1	49.5	3510	24.3	4.7	306	3930	1400	.	.	19.5	210.95	.
2003_P_Till_3	MZTRF	2003	10	4	Canolat-Flax-Dur	25-25-0	ZT	2836.6	15.1	158	33.2	47.6	3600	19.3	4.56	299	3960	1520	.	.	21.75	229.93	.
2003_P_Till_3	MZTRF	2003	6	4	Wheat-Flax-Dur	50-25-0	ZT	3077.8	15.5	144	33.6	48	3800	17.8	4	268	3710	1390	.	.	16.75	212.85	.
2003_P_Till_3	MZTRF	2003	2	4	Wheat-Flax-Dur	0-25-0	ZT	2998.8	15.7	137	37.6	49.7	3575	16.3	3.84	278	3900	1460	.	.	18	232.16	.
2003_P_Till_3	MZTRF	2003	1	4	Wheat-Flax-Dur	0-0-25	ZT	3056.6	16	162	40.7	54	3875	18.8	4.17	312	4020	1510	.	.	22.5	211.71	.
2003_P_Till_3	MZTRF	2003	3	4	Wheat-Flax-Dur	25-0-25	ZT	3169.6	15.6	160	35.9	52.9	3890	17.3	3.97	340	4030	1540	.	.	21.5	200.99	.
2003_P_Till_3	MZTRF	2003	11	4	Canolat-Flax-Dur	50-0-25	ZT	3081.6	15.5	170	28.4	47.1	3610	15.1	3.62	308	3805	1420	.	.	24.75	211.62	.
2003_P_Till_3	MZTRF	2003	5	4	Wheat-Flax-Dur	50-0-25	ZT	3112.4	15.5	153	27.2	50.4	3690	16.3	3.72	296	3890	1470	.	.	23.5	217.27	.
2003_P_Till_3	MZTRF	2003	9	4	Canolat-Flax-Dur	25-0-25	ZT	3072.6	15.8	151	24.5	47	3530	17.5	4.12	278	3790	1370	.	.	17.5	200.44	.
